# Supplementary material for: A gut bacterial amyloid promotes α-synuclein aggregation and motor impairment in mice
Source: eLife. 2020 Feb 11;9:e53111. doi: 10.7554/eLife.53111 (PMC7012599; doi:10.7554/eLife.53111)
Supplement: Figure 1—figure supplement 1—source data 1. [file elife-53111-fig1-figsupp1-data1.xlsx]

## Sheet: Fig. 1, fig sup 1
Figure 1, figure supplement 1 Motor Testing
Mono-colonized Mice		Fig. S1A	Fig. S1B	Fig. S1C	Fig. S1D
Colonization	Genotype	Beam Crossing (sec)	Pole Descent (sec)	Adhesive Removal (sec)	Hindlimb Score (0-3)		Shading Represents Independent Groups
Bfrag	WT	4.29	3.2	0.76	DNT		PUP- Physically Unable to Perform; Animal Did Not Complete Task
Bfrag	WT	4.07	3.42	0.91	DNT		DNT- Did Not Test; Cohort was not Tested
Bfrag	WT	4.74	4.55	0.97	DNT
Bfrag	ASO	6.47	3.5	6.22	DNT
Bfrag	ASO	4.49	7.19	3.36	DNT
Bfrag	ASO	5.11	5.6	1.07	DNT
Bfrag	WT	2.81	2.95	1.33	0
Bfrag	WT	2.07	2.89	2.72	0
Bfrag	WT	2.56	3.34	0.85	0
Bfrag	WT	2.47	3.22	4.49	1
Bfrag	WT	2.93	4.63	2.35	0
Bfrag	ASO	9.18	14.72	5.71	1
Bfrag	ASO	8.33	8.05	1.77	1
Bfrag	ASO	5.05	6.53	3.33	1
Bfrag	ASO	5.38	11.74	3.32	0
Bfrag	ASO	3.73	9.19	3.49	1
Bfrag	ASO	3.08	5.19	1.12	1
SFB	WT	8.3	5.37	1.86	DNT
SFB	WT	2.61	10.58	1.63	DNT
SFB	WT	6.16	6.58	1.67	DNT
SFB	WT	5.28	1.94	1.01	DNT
SFB	WT	5.4	4.91	2.75	DNT
SFB	WT	2.61	6.93	PUP	DNT
SFB	ASO	5.51	5.86	4.69	DNT
SFB	ASO	6.13	6.45	7.32	DNT
SFB	ASO	3.81	8.87	7.05	DNT
SFB	ASO	2.49	14.62	3.38	DNT
SFB	ASO	6.96	10.74	3.44	DNT
SFB	ASO	4.29	6.19	2.41	DNT
SFB	ASO	2.68	12.35	1.56	DNT
SFB	WT	1.64	4.81	1.48	0
SFB	WT	4.68	7.24	3.09	0
SFB	WT	1.53	2.48	1.78	0
SFB	WT	7.09	5.47	1.41	0
SFB	ASO	2.88	7.2	10.99	1
SFB	ASO	8.16	3.27	1.22	0
SFB	ASO	2.36	4.32	3.94	0
SFB	ASO	4.83	6.69	4.22	1
SFB	ASO	2.47	16.73	4.72	1
SFB	ASO	2.37	3.34	4.37	1
SFB	ASO	2.62	5.23	1.86	0
SFB	ASO	2.82	3.7	1.77	0
Ecoli WT	WT	2.94	4.71	DNT	0
Ecoli WT	WT	2.49	5.28	DNT	0
Ecoli WT	WT	3.49	4.96	DNT	0
Ecoli WT	WT	7.26	4.19	3.83	0
Ecoli WT	WT	1.35	1.45	1.12	0
Ecoli WT	WT	1.53	3.41	2	1
Ecoli WT	WT	2.32	1.32	1.12	0
Ecoli WT	WT	7.25	5.34	1.7	0
Ecoli WT	WT	4.73	7.31	0.92	0
Ecoli WT	WT	7.22	4.71	1.09	0
Ecoli WT	WT	6.29	9.37	1.18	0
Ecoli WT	WT	7.06	10.58	4.99	0
Ecoli WT	WT	5.1	3.47	1.02	0
Ecoli WT	ASO	9.85	30.56	DNT	2
Ecoli WT	ASO	7.51	17.64	DNT	2
Ecoli WT	ASO	7.93	20.89	DNT	1
Ecoli WT	ASO	5.23	7.17	2.05	1
Ecoli WT	ASO	6.12	7.64	2.92	1
Ecoli WT	ASO	7.74	7.47	2.36	2
Ecoli WT	ASO	7.06	13.83	8.35	2
Ecoli WT	ASO	17.5	4.85	1.97	2
Ecoli WT	ASO	7.09	9.91	1.77	1
Ecoli WT	ASO	6.37	PUP	4.62	2
Ecoli WT	ASO	9.81	13.97	11.19	2
Ecoli WT	ASO	8.05	5.11	10.14	1
Ecoli WT	ASO	10.59	8.93	9.85	2
Ecoli WT	ASO	16.59	22.23	2.11	1
Fig. S1E
Principle Coordinate Analysis, PC1 and PC2 from ClustVis
B. frag WT			B. frag ASO
PC2	PC1		PC2	PC1
0.0382359	-0.115885		-0.145389	0.0384561
0.0318709	-0.11472		-0.0184091	-0.0158092
0.0506885	-0.0875318		0.0631375	-0.0663724
0.0105458	-0.211878		0.0244667	0.247315
-0.0551563	-0.20019		0.0966265	0.0779327
0.0304818	-0.221935		-0.0258615	0.0257691
-0.142816	-0.0404639		0.0621492	-0.0223735
-0.00984524	-0.170454		-0.0208421	0.0322684
			0.0208281	-0.072442
SFB WT			SFB ASO
PC2	PC1		PC2	PC1
0.0723315	0.0106618		-0.0723472	0.0157212
0.0618709	-0.0496057		-0.161615	0.0863331
0.064246	-0.0223296		-0.155324	0.0615812
0.0279739	-0.1054		0.035044	0.0277287
-0.00687174	-0.0353625		0.0501879	0.0751524
-0.0409816	-0.0594286		0.00572217	-0.0499643
0.00931705	-0.211443		0.0851441	-0.0297515
0.0126817	-0.0915694		-0.351049	0.139861
-0.0295253	-0.233978		0.0899947	-0.102694
0.0923495	-0.0958486		-0.0841704	-0.154205
			-0.0621054	0.0405442
			-0.00427417	0.115606
			-0.137781	-0.0438089
			0.0116524	-0.179628
			0.00126607	-0.194486
E. coli WT			E. coli ASO
PC2	PC1		PC2	PC1
-0.0436612	-0.152428		0.278959	0.502787
-0.043344	-0.154909		0.106597	0.310708
-0.0334299	-0.13837		0.173873	0.242708
-0.0154731	-0.0592424		0.0341859	0.0113318
-0.0173006	-0.262116		0.0169394	0.0515877
-0.0544063	-0.106148		0.032528	0.184264
-0.00551301	-0.244051		-0.144449	0.359448
0.0812907	-0.0884417		0.150246	0.343163
0.0999188	-0.13204		0.10012	0.0742493
0.0979418	-0.107897		-0.0768222	0.199417
0.133046	-0.0726604		-0.327889	0.359582
0.00569741	0.0311303		-0.271236	0.20353
0.059211	-0.165947		-0.209997	0.404919
			0.348518	0.410051
Fig. S1F
cfu / g feces
WT		ΔcsgBAC
WT	ASO	WT	ASO
22000000	9000000	8000000	520000000
40000000	42200000	320000000	40000000
50000000	15000000	130000000	37500000
37100000	50000000	180000000	52500000
271000000	175000000	93300000	23500000
65000000	40000000	14000000	51700000
62500000	56000000	8500000	11300000
88900000		53300000	18000000
38600000		60000000	50000000
113000000		113000000	48000000
260000000			55000000
			12800000
Fig. S1G
cfu / cm large intestine
Tissue / mucous		Lumen
WT	ΔcsgBAC	WT	ΔcsgBAC
5000000	10000000	200000000	1400000000
20000000	5000000	4700000000	1100000000
4000000	2500000	1600000000	1000000000
Fig. S1H
Fold change csgA expression, feces
WT		ΔcsgBAC
WT	ASO	WT	ASO
0.677011	2.21194	not detected	not detected
0.580381	1.59327
1.02925	0.304508
1.01052	0.239304
1.5603	2.47228
1.53424	2.49149
0.721963	3.46272
0.886332	3.21403
Fig. S1J
LAL Assay, response curve
cfu	WT	ΔcsgBAC
100000000	2.5474	2.37986
10000000	2.51268	2.48966
100000	1.9887	1.72327
1000	0.0346151	0.0400427
10	0.024181	0.024181

## Sheet: Fig. 1, fig sup 1 Statistics
Fig. S1A
ANOVA summary			ANOVA table	SS	DF	MS	F (DFn, DFd)	P value
F	9.147		Treatment (between columns)	275.1	5	55.01	F (5, 63) = 9.147	P<0.0001
P value	<0.0001		Residual (within columns)	378.9	63	6.014
P value summary	****		Total	653.9	68
Significant diff. among means (P < 0.05)?	Yes
R square	0.4206
Tukey's multiple comparisons test	Mean Diff.	95.00% CI of diff.	Significant?	Summary	Adjusted P Value
Column A vs. Column B	-2.404	-5.907 to 1.098	No	ns	0.3443
Column A vs. Column C	-1.288	-4.707 to 2.132	No	ns	0.8768
Column A vs. Column D	-0.7828	-3.938 to 2.373	No	ns	0.9776
Column A vs. Column E	-1.298	-4.537 to 1.941	No	ns	0.8455
Column A vs. Column F	-5.86	-9.055 to -2.666	Yes	****	<0.0001
Column B vs. Column C	1.117	-2.195 to 4.429	No	ns	0.9191
Column B vs. Column D	1.621	-1.418 to 4.661	No	ns	0.6222
Column B vs. Column E	1.106	-2.020 to 4.232	No	ns	0.9025
Column B vs. Column F	-3.456	-6.536 to -0.3766	Yes	*	0.0191
Column C vs. Column D	0.5047	-2.438 to 3.447	No	ns	0.9958
Column C vs. Column E	-0.01077	-3.043 to 3.021	No	ns	>0.9999
Column C vs. Column F	-4.573	-7.557 to -1.588	Yes	***	0.0004
Column D vs. Column E	-0.5154	-3.247 to 2.216	No	ns	0.9935
Column D vs. Column F	-5.078	-7.756 to -2.399	Yes	****	<0.0001
Column E vs. Column F	-4.562	-7.338 to -1.786	Yes	***	0.0001
Fig. S1B
ANOVA summary			ANOVA table	SS	DF	MS	F (DFn, DFd)	P value
F	6.613		Treatment (between columns)	646.3	5	129.3	F (5, 62) = 6.613	P<0.0001
P value	<0.0001		Residual (within columns)	1212	62	19.55
P value summary	****		Total	1858	67
Significant diff. among means (P < 0.05)?	Yes
R square	0.3478
Tukey's multiple comparisons test	Mean Diff.	95.00% CI of diff.	Significant?	Summary	Adjusted P Value
Column A vs. Column B	-4.443	-10.76 to 1.874	No	ns	0.3173
Column A vs. Column C	-2.106	-8.273 to 4.061	No	ns	0.9148
Column A vs. Column D	-4.179	-9.871 to 1.513	No	ns	0.2717
Column A vs. Column E	-1.56	-7.402 to 4.282	No	ns	0.9691
Column A vs. Column F	-9.567	-15.41 to -3.725	Yes	***	0.0001
Column B vs. Column C	2.337	-3.637 to 8.310	No	ns	0.8581
Column B vs. Column D	0.2638	-5.218 to 5.745	No	ns	>0.9999
Column B vs. Column E	2.883	-2.754 to 8.521	No	ns	0.6631
Column B vs. Column F	-5.125	-10.76 to 0.5130	No	ns	0.0955
Column C vs. Column D	-2.073	-7.381 to 3.235	No	ns	0.8589
Column C vs. Column E	0.5464	-4.922 to 6.015	No	ns	0.9997
Column C vs. Column F	-7.461	-12.93 to -1.993	Yes	**	0.0022
Column D vs. Column E	2.619	-2.307 to 7.546	No	ns	0.6251
Column D vs. Column F	-5.388	-10.31 to -0.4619	Yes	*	0.0241
Column E vs. Column F	-8.008	-13.11 to -2.908	Yes	***	0.0003
Fig. S1C
ANOVA summary			ANOVA table	SS	DF	MS	F (DFn, DFd)	P value
F	4.012		Treatment (between columns)	108.4	5	21.69	F (5, 56) = 4.012	P=0.0035
P value	0.0035		Residual (within columns)	302.8	56	5.407
P value summary	**		Total	411.2	61
Significant diff. among means (P < 0.05)?	Yes
R square	0.2637
Tukey's multiple comparisons test	Mean Diff.	95.00% CI of diff.	Significant?	Summary	Adjusted P Value
Column A vs. Column B	-1.468	-4.802 to 1.866	No	ns	0.7841
Column A vs. Column C	-0.05583	-3.390 to 3.278	No	ns	>0.9999
Column A vs. Column D	-2.399	-5.402 to 0.6052	No	ns	0.1897
Column A vs. Column E	-0.0995	-3.354 to 3.155	No	ns	>0.9999
Column A vs. Column F	-3.414	-6.602 to -0.2263	Yes	*	0.0291
Column B vs. Column C	1.412	-1.822 to 4.646	No	ns	0.79
Column B vs. Column D	-0.9304	-3.823 to 1.962	No	ns	0.9317
Column B vs. Column E	1.369	-1.784 to 4.521	No	ns	0.794
Column B vs. Column F	-1.946	-5.030 to 1.137	No	ns	0.4356
Column C vs. Column D	-2.343	-5.235 to 0.5501	No	ns	0.1776
Column C vs. Column E	-0.04367	-3.196 to 3.109	No	ns	>0.9999
Column C vs. Column F	-3.358	-6.442 to -0.2747	Yes	*	0.0252
Column D vs. Column E	2.299	-0.5019 to 5.100	No	ns	0.1664
Column D vs. Column F	-1.016	-3.739 to 1.708	No	ns	0.8791
Column E vs. Column F	-3.315	-6.313 to -0.3171	Yes	*	0.022
Fig. S1D
ANOVA summary			ANOVA table	SS	DF	MS	F (DFn, DFd)	P value
F	21.2		Treatment (between columns)	19.24	5	3.847	F (5, 44) = 21.20	P<0.0001
P value	<0.0001		Residual (within columns)	7.985	44	0.1815
P value summary	****		Total	27.22	49
Significant diff. among means (P < 0.05)?	Yes
R square	0.7067
Tukey's multiple comparisons test	Mean Diff.	95.00% CI of diff.	Significant?	Summary	Adjusted P Value
Column A vs. Column B	-0.6333	-1.402 to 0.1351	No	ns	0.1601
Column A vs. Column C	0.2	-0.6513 to 1.051	No	ns	0.981
Column A vs. Column D	-0.3	-1.023 to 0.4235	No	ns	0.8172
Column A vs. Column E	0.1231	-0.5447 to 0.7909	No	ns	0.9937
Column A vs. Column F	-1.371	-2.033 to -0.7103	Yes	****	<0.0001
Column B vs. Column C	0.8333	0.01418 to 1.652	Yes	*	0.0441
Column B vs. Column D	0.3333	-0.3520 to 1.019	No	ns	0.6975
Column B vs. Column E	0.7564	0.1301 to 1.383	Yes	**	0.0099
Column B vs. Column F	-0.7381	-1.357 to -0.1189	Yes	*	0.0112
Column C vs. Column D	-0.5	-1.277 to 0.2771	No	ns	0.406
Column C vs. Column E	-0.07692	-0.8025 to 0.6487	No	ns	0.9996
Column C vs. Column F	-1.571	-2.291 to -0.8520	Yes	****	<0.0001
Column D vs. Column E	0.4231	-0.1472 to 0.9933	No	ns	0.2539
Column D vs. Column F	-1.071	-1.634 to -0.5090	Yes	****	<0.0001
Column E vs. Column F	-1.495	-1.983 to -1.006	Yes	****	<0.0001
Fig. S1H
Unpaired t test
P value	0.0426
P value summary	*
Significantly different (P < 0.05)?	Yes
One- or two-tailed P value?	Two-tailed
t, df	t=2.230, df=14
