# Supplementary material for: A gut bacterial amyloid promotes α-synuclein aggregation and motor impairment in mice
Source: eLife. 2020 Feb 11;9:e53111. doi: 10.7554/eLife.53111 (PMC7012599; doi:10.7554/eLife.53111)
Supplement: Figure 1—figure supplement 2—source data 1. [file elife-53111-fig1-figsupp2-data1.xlsx]

## Sheet: Fig 1, fig sup 2
Fig. S2A
Fold change synuclein production
WT		ΔcsgBAC
WT	ASO	WT	ASO
1.01761	6.62622	2.25049	5.90411
0.982387	6.61448	2.52055	6.11742
1.27202	7.44423	1.47945	8.14481
Fig. S2B
Striatum synuclein fibril density
WT		ΔcsgBAC
WT	ASO	WT	ASO
0.035	1.95	0.231	1.914
0.227	1.851	0.07	1.364
0.364	1.673	0.403	1.63
Fig. S2C
Midbrain synuclein fibril density
WT		ΔcsgBAC
WT	ASO	WT	ASO
0.063	1.922	0.055	0.81
0.267	1.591	0.203	0.772
0.029	1.27	0.186	0.227
Fig. S2F
Soluble aSyn density- midbrain, ASO mice
WT	ΔcsgBAC
3.132	2.496
2.443	0.469
2.772	2.67
Fig. S2G
Insoluble aSyn density- midbrain, ASO mice
WT	ΔcsgBAC
0.607	0.351
0.618	0.329
0.65	0.328
Fig. S2H
pS129aSyn density- midbrain, ASO mice
WT	ΔcsgBAC
1.346	0.512
1.47	0.671
0.926	0.889
Fig. S2I
pS129-aSyn+ cells / mm^2, frontal cortex ASO mice
WT	ΔcsgBAC
0.810856	0.955895
0.9642	0.461922
1.01076	0.48546
Fig. S2M
PGP9.5+ cells per ganglia, proximal large intestine
WT	ΔcsgBAC
31	45
34	26
23	28
Fig. S2O
Duodenum synuclein fibril density
WT	ΔcsgBAC
2.286	1.093
1.98	2.296
2.989	2.163
3.876	1.385
Fig. S2P
Prox large int synuclein fibril density
WT	ΔcsgBAC
6.638	3.308
9.277	3.905
4.591	2.616
3.56	4.079
Fig. S2Q
Dopamine ELISA, striatum (ng/mg)
WT		ΔcsgBAC
WT	ASO	WT	ASO
5.75498	20.2111	8.66703	7.28756
4.33014	38.7286	4.29125	6.48507
8.80638	25.5698	31.8774	2.32574
15.7129	16.9161	10.5036	9.7118
11.3029	30.9491	9.57536	4.27835
21.7837	7.3558	7.96721	6.36147
4.58543	16.2891	19.6399	10.3917
	27.909		13.0026
			17.0187
Fig. S2R
Fold-change TH expression, midbrain
WT	ΔcsgBAC
0.85816	0.722119
1.39421	1.3165
0.98237	1.65616
0.775899
Fig. S2S
TH+ cells per fame SN, ASO mice
WT	ΔcsgBAC
81	58
61	122
121	117
145	151
39

## Sheet: Fig 1, fig sup 2 Source Gels
Fig. S2D
Fig. S2E
Fig. S2N

## Sheet: Fig 1, fig sup 2 Statistics
Fig. S2A
ANOVA summary			ANOVA table	SS	DF	MS	F (DFn, DFd)	P value
F	53.6		Treatment (between columns)	83.31	3	27.77	F (3, 8) = 53.60	P<0.0001
P value	<0.0001		Residual (within columns)	4.145	8	0.5181
P value summary	****		Total	87.46	11
Significant diff. among means (P < 0.05)?	Yes
R square	0.9526
Tukey's multiple comparisons test	Mean Diff.	95.00% CI of diff.	Significant?	Summary	Adjusted P Value
Column A vs. Column B	-5.804	-7.686 to -3.922	Yes	****	<0.0001
Column A vs. Column C	-0.9928	-2.875 to 0.8893	No	ns	0.3879
Column A vs. Column D	-5.631	-7.514 to -3.749	Yes	****	<0.0001
Column B vs. Column C	4.811	2.929 to 6.694	Yes	***	0.0002
Column B vs. Column D	0.1729	-1.709 to 2.055	No	ns	0.9905
Column C vs. Column D	-4.639	-6.521 to -2.756	Yes	***	0.0002
Fig. S2B
ANOVA summary			ANOVA table	SS	DF	MS	F (DFn, DFd)	P value
F	61.02		Treatment (between columns)	6.883	3	2.294	F (3, 8) = 61.02	P<0.0001
P value	<0.0001		Residual (within columns)	0.3008	8	0.0376
P value summary	****		Total	7.183	11
Significant diff. among means (P < 0.05)?	Yes
R square	0.9581
Tukey's multiple comparisons test	Mean Diff.	95.00% CI of diff.	Significant?	Summary	Adjusted P Value
Column A vs. Column B	-1.616	-2.123 to -1.109	Yes	****	<0.0001
Column A vs. Column C	-0.026	-0.5330 to 0.4810	No	ns	0.9983
Column A vs. Column D	-1.427	-1.934 to -0.9203	Yes	****	<0.0001
Column B vs. Column C	1.59	1.083 to 2.097	Yes	****	<0.0001
Column B vs. Column D	0.1887	-0.3183 to 0.6957	No	ns	0.6483
Column C vs. Column D	-1.401	-1.908 to -0.8943	Yes	****	<0.0001
Fig. S2C
ANOVA summary			ANOVA table	SS	DF	MS	F (DFn, DFd)	P value
F	24.13		Treatment (between columns)	4.268	3	1.423	F (3, 8) = 24.13	P=0.0002
P value	0.0002		Residual (within columns)	0.4716	8	0.05895
P value summary	***		Total	4.74	11
Significant diff. among means (P < 0.05)?	Yes
R square	0.9005
Tukey's multiple comparisons test	Mean Diff.	95.00% CI of diff.	Significant?	Summary	Adjusted P Value
Column A vs. Column B	-1.475	-2.110 to -0.8398	Yes	***	0.0003
Column A vs. Column C	-0.02833	-0.6632 to 0.6065	No	ns	0.9989
Column A vs. Column D	-0.4833	-1.118 to 0.1515	No	ns	0.1465
Column B vs. Column C	1.446	0.8115 to 2.081	Yes	***	0.0004
Column B vs. Column D	0.9913	0.3565 to 1.626	Yes	**	0.0046
Column C vs. Column D	-0.455	-1.090 to 0.1798	No	ns	0.1783
Fig. S2G
Unpaired t test
P value	<0.0001
P value summary	****
Significantly different (P < 0.05)?	Yes
One- or two-tailed P value?	Two-tailed
t, df	t=19.37, df=4
Fig. S2H
Unpaired t test
P value	0.048
P value summary	*
Significantly different (P < 0.05)?	Yes
One- or two-tailed P value?	Two-tailed
t, df	t=2.817, df=4
Fig. S2L
Unpaired t test
P value	0.1621
P value summary	ns
Significantly different (P < 0.05)?	No
One- or two-tailed P value?	Two-tailed
t, df	t=1.712, df=4
Fig. S2O
Unpaired t test
P value	0.0871
P value summary	ns
Significantly different (P < 0.05)?	No
One- or two-tailed P value?	Two-tailed
t, df	t=2.043, df=6
Fig. S2P
Unpaired t test
P value	0.0994
P value summary	ns
Significantly different (P < 0.05)?	No
One- or two-tailed P value?	Two-tailed
t, df	t=1.948, df=6
Fig. S2Q
ANOVA summary			ANOVA table	SS	DF	MS	F (DFn, DFd)	P value
F	5.581		Treatment (between columns)	1012	3	337.2	F (3, 27) = 5.581	P=0.0041
P value	0.0041		Residual (within columns)	1631	27	60.41
P value summary	**		Total	2643	30
Significant diff. among means (P < 0.05)?	Yes
R square	0.3828
Tukey's multiple comparisons test	Mean Diff.	95.00% CI of diff.	Significant?	Summary	Adjusted P Value
Column A vs. Column B	-12.67	-23.67 to -1.658	Yes	*	0.0196
Column A vs. Column C	-2.892	-14.26 to 8.477	No	ns	0.8977
Column A vs. Column D	1.785	-8.934 to 12.50	No	ns	0.9679
Column B vs. Column C	9.774	-1.235 to 20.78	No	ns	0.0953
Column B vs. Column D	14.45	4.115 to 24.79	Yes	**	0.0037
Column C vs. Column D	4.677	-6.042 to 15.40	No	ns	0.6358
