# Supplementary material for: A gut bacterial amyloid promotes α-synuclein aggregation and motor impairment in mice
Source: eLife. 2020 Feb 11;9:e53111. doi: 10.7554/eLife.53111 (PMC7012599; doi:10.7554/eLife.53111)
Supplement: Figure 1—figure supplement 3—source data 1. [file elife-53111-fig1-figsupp3-data1.xlsx]

## Sheet: Fig 1, fig supp 3
Fig. S3A
Midbrain IL-6 concentration (pg/mg)					Midbrain TNFa concentration (pg/mg)
WT		ΔcsgBAC			WT		ΔcsgBAC
WT	ASO	WT	ASO		WT	ASO	WT	ASO
138.581	163.921	86.9464	117.003		185.513	451.509	137.516	292.434
114.908	115.381	81.4234	103.061		271.984	347.039	177.444	187.227
112.133	146.06	123.989	86.7049		149.926	463.289	213.41	299.782
85.1045	132.329	104.502	92.5804		248.279	327.2	270.617	216.074
110.142	181.808	90.7604	107.549		263.26	385.489	212.305	303.832
83.2147	108.448	90.3718	81.1572		267.949	261.329	209.267	229.946
	156.879	90.078				435.355	380.841
Fig. S3B
Striatum IL-6 concentration (pg/mg)					Striatum TNFa concentration (pg/mg)
WT		ΔcsgBAC			WT		ΔcsgBAC
WT	ASO	WT	ASO		WT	ASO	WT	ASO
168.06	193.105	103.201	126.899		27.9184	334.041	95.3552	20.7625
93.5469	199.906	55.7993	121.464		14.6183	143.241	17.3325	100.987
126.551	188.6	91.8361	136.567		10.2163	343.511	27.2597	162.696
118.333	180.304	119.837	86.6153		31.6021	304.962	85.2334	71.2765
119.689	198.587	164.258	105.364		117.36	259.392	134.712	48.5507
74.0269	124.872	109.151	98.309		26.4017	192.046	102.205	54.008
135.373	166.106		155.708		13.9212	70.3722	76.4263	44.0792
	174.5		169.998		118.326			173.847
								177.143
Fig. S3C
Fold change il6 expression CD11b enriched cells					Fold change tnfa expression CD11b enriched cells
WT		ΔcsgBAC			WT		ΔcsgBAC
WT	ASO	WT	ASO		WT	ASO	WT	ASO
0.959885	1.84745	0.0837812	2.00751		0	5.83538	0	2.66322
1.07148	3.59666	0.311762	2.15122		1.78756	1.89076	0.288208	2.99612
0.868639	4.47126	0.211318	0.883948		0	0.802051	1.50816	0.0400644
2.58347	1.08797	0.584969	1.00402		0.134795	3.24834	0	0.735398
0.375504	5.91877	3.54291	1.00592		0.967941	5.50343	2.50041	0
0.141026	6.15909	1.42356			3.10971	3.28181	0.341804	2.26082
Fig. S3E
ASO mice, SN
Iba+ cell diameter (um)			Iba+ cell branch length (um)			Iba+ cell branch points
WT	ΔcsgBAC		WT	ΔcsgBAC		WT	ΔcsgBAC
5.75	4.34		818	2002.7		67.3	146.8
5.62	4.3		1248.4	2374.3		85	160.6
5.76	4.52		703.8	1542.2		45.7	94.3
4.98	4.25		842.8	1222.6		54.8	90.5
Fig. S3G
ASO mice, Striatum
Iba+ cell diameter (um)			Iba+ cell branch length (um)			Iba+ cell branch points
WT	ΔcsgBAC		WT	ΔcsgBAC		WT	ΔcsgBAC
5.13	4.91		655.6	943.8		39.4	66
5.77	4.77		454.4	725.3		26.4	40.1
5.19	4.72		750.4	1095.4		53.2	81.8
5.34	4.65		949.7	1317.2		64.2	95.4
Fig. S3H
Bioplex Analysis, Proximal large intestine
	WT E. coli						ΔcsgBAC
Cytokine	WT	WT	WT	ASO	ASO	ASO	WT	WT	WT	ASO	ASO	ASO
IL-1a	38.14	19.56	39.86	44	14.6	40.14	4.82	29.68	16.32	36.4	10.82	nd
IL-1b	14.16	10.34	29.5	17.62	17.62	22.36	8.2	10.34	5.8	5.8	5.8	5.8
IL-2	15.5	6.98	28	20.88	6.98	27.7	0.36	1.88	2.5	24.04	4.14	1.88
IL-4	5.16	1.84	3.54	1.84	0.96	3.54	nd	0.48	0.48	1.84	0.96	nd
IL-5	5.04	3.42	6.64	4.5	5.58	4.5	3.42	nd	2.32	3.42	2.32	2.32
IL-6	6.58	4.26	9.48	8.22	5.98	4.02	nd	1.04	0.4	4.02	2.18	nd
IL-9	39.14	20.36	108.76	34.2	26.24	71.28	5.14	9.84	nd	57.06	13.7	nd
IL-10	21.06	16.64	21.06	16.64	16.64	21.06	7.28	4.74	2	15.52	8.5	4.74
IL-12(p40)	139.08	98.1	170.84	189.92	172.04	92.78	47.48	62.3	100.74	62.3	47.48	nd
IL-12(p70)	74.74	65.62	106.42	119.94	61.06	99.66	31.14	28.8	42.7	56.48	35.78	14.7
IL-17	6.14	4.56	8.24	10.32	9.28	8.24	5.62	4.56	5.88	9.02	5.62	5.1
Eotaxin	375.64	358.58	767	357.7	447.92	473.92	87.46	297.64	296.74	324.04	380.04	nd
G-CSF	6.56	6.56	8.8	8.8	6.56	8.8	1.82	1.82	nd	4.26	4.26	1.82
GM-CSF	33.54	19.72	24.34	30.14	26.4	26.4	10.04	10.04	nd	3.92	17.02	10.04
IFN-g	21.96	14.48	56.58	24.2	17.38	55.52	2.8	2.8	2.8	41.74	9.12	1.42
KC	16.1	15.46	25.92	16.1	12.08	9.88	8.28	7.44	3.54	7.44	6.56	4.64
MCP-1	316.04	238.38	367.06	342.44	229.24	176.92	287.38	120.12	nd	77.7	101.14	nd
MIP-1b	11.9	7.12	13.52	7.8	11.12	5.52	3.64	3.76	4.6	6.68	5.3	1.8
MIP-1b	31.26	17.14	39.56	19.7	24.52	20.94	8.46	11.6	4.88	17.14	11.6	4.88
RANTES	285.24	227.72	512.42	243.92	236.3	231.1	57.3	199.66	140.04	383.92	253.62	13.68
TNF-a	91.1	58.34	74.78	66.58	74.78	91.1	33.34	33.34	24.9	66.58	33.34	33.34
Fig. S3I
Bioplex Analysis, serum
	WT E. coli				ΔcsgBAC
Cytokine	ASO	ASO	ASO	ASO	ASO	ASO	ASO	ASO
IL6	2.64	2.64	3.42	3.81	3.42	9.09	3.42	4.59
IL12p40	1183.26	787.26	1526.82	1516.8	1686.27	1735.86	1244.46	1173.03
IL12p70	236.49	84.9	32.91	84.9	478.38	113.61	84.9	291.99
IL17	102.39	47.79	33.54	53.97	219.39	23.55	4.41	119.58
EOTAXIN	2863.56	667.17	709.2	1447.77	1060.74	1467.15	1332.36	2209.14
GCSF	249.27	128.16	40.89	93.57	202.83	753	224.67	148.17
KC	83.64	85.38	107.4	104.07	62.55	95.61	114.06	220.11
RANTES	125.91	nd	112.62	56.76	112.62	56.76	8.37	125.91
TNF	97.32	83.37	83.37	90.42	174.27	110.85	83.37	124.02
Fig. S3J
Proximal Large Intestine
IL-6 ELISA			IL-17 ELISA
WT	ΔcsgBAC		WT	ΔcsgBAC
28.6607	10.4483		81.7644	39.8051
15.0124	10.568		58.0172	37.662
29.4334	10.6204		103.155	28.544
26.8575	19.636		108.398	47.6345
	16.023			55.1226
Fig. S3K
Duodenum
IL-6 ELISA			IL-17 ELISA
WT	ΔcsgBAC		WT	ΔcsgBAC
7.42852	7.59419		38.3095	30.7033
7.57265	7.92497		46.3468	35.8354
5.2595	14.744		17.642	55.5598
9.992	7.09239		100.646	43.5915
	11.1401			36.801

## Sheet: Fig 1, fig supp 3 Statistics
Fig. S3A
Midbrain IL-6 concentration (pg/mg)
ANOVA summary				ANOVA table	SS	DF	MS	F (DFn, DFd)	P value
F	8.775			Treatment (between columns)	10189	3	3396	F (3, 22) = 8.775	P=0.0005
P value	0.0005			Residual (within columns)	8515	22	387.1
P value summary	***			Total	18704	25
Significant diff. among means (P < 0.05)?	Yes
R square	0.5447
Tukey's multiple comparisons test	Mean Diff.	95.00% CI of diff.	Significant?	Summary	Adjusted P Value
Column A vs. Column B	-36.2	-66.59 to -5.806	Yes	*	0.0157
Column A vs. Column C	11.91	-18.49 to 42.30	No	ns	0.7003
Column A vs. Column D	9.338	-22.20 to 40.88	No	ns	0.8434
Column B vs. Column C	48.11	18.91 to 77.31	Yes	***	0.0008
Column B vs. Column D	45.54	15.14 to 75.93	Yes	**	0.0021
Column C vs. Column D	-2.571	-32.96 to 27.82	No	ns	0.9953
Midbrain TNFa concentration (pg/mg)
ANOVA summary				ANOVA table	SS	DF	MS	F (DFn, DFd)	P value
F	8.337			Treatment (between columns)	108413	3	36138	F (3, 22) = 8.337	P=0.0007
P value	0.0007			Residual (within columns)	95364	22	4335
P value summary	***			Total	203776	25
Significant diff. among means (P < 0.05)?	Yes
R square	0.532
Tukey's multiple comparisons test	Mean Diff.	95.00% CI of diff.	Significant?	Summary	Adjusted P Value
Column A vs. Column B	-150.4	-252.2 to -48.74	Yes	**	0.0024
Column A vs. Column C	2.38	-99.33 to 104.1	No	ns	0.9999
Column A vs. Column D	-23.73	-129.3 to 81.82	No	ns	0.9232
Column B vs. Column C	152.8	55.11 to 250.6	Yes	**	0.0014
Column B vs. Column D	126.7	25.01 to 228.4	Yes	*	0.0111
Column C vs. Column D	-26.11	-127.8 to 75.60	No	ns	0.8909
Fig. S3B
Striatum IL-6 concentration (pg/mg)
ANOVA summary				ANOVA table	SS	DF	MS	F (DFn, DFd)	P value
F	8.492			Treatment (between columns)	22041	3	7347	F (3, 25) = 8.492	P=0.0005
P value	0.0005			Residual (within columns)	21630	25	865.2
P value summary	***			Total	43670	28
Significant diff. among means (P < 0.05)?	Yes
R square	0.5047
Tukey's multiple comparisons test	Mean Diff.	95.00% CI of diff.	Significant?	Summary	Adjusted P Value
Column A vs. Column B	-58.88	-100.8 to -17.01	Yes	**	0.0036
Column A vs. Column C	12.02	-32.99 to 57.03	No	ns	0.8822
Column A vs. Column D	-5.747	-47.62 to 36.13	No	ns	0.9812
Column B vs. Column C	70.9	27.21 to 114.6	Yes	***	0.0008
Column B vs. Column D	53.13	12.68 to 93.59	Yes	**	0.0068
Column C vs. Column D	-17.77	-61.46 to 25.93	No	ns	0.6817
Striatum TNFa concentration (pg/mg)
ANOVA summary				ANOVA table	SS	DF	MS	F (DFn, DFd)	P value
F	11.56			Treatment (between columns)	153496	3	51165	F (3, 27) = 11.56	P<0.0001
P value	<0.0001			Residual (within columns)	119461	27	4424
P value summary	****			Total	272957	30
Significant diff. among means (P < 0.05)?	Yes
R square	0.5623
Tukey's multiple comparisons test	Mean Diff.	95.00% CI of diff.	Significant?	Summary	Adjusted P Value
Column A vs. Column B	-190.3	-284.5 to -96.11	Yes	****	<0.0001
Column A vs. Column C	-31.89	-126.1 to 62.32	No	ns	0.7911
Column A vs. Column D	-49.77	-138.2 to 38.68	No	ns	0.4287
Column B vs. Column C	158.4	61.14 to 255.7	Yes	***	0.0007
Column B vs. Column D	140.5	48.82 to 232.3	Yes	**	0.0014
Column C vs. Column D	-17.88	-109.6 to 73.85	No	ns	0.9501
Fig. S3C
IL6 expression
ANOVA summary			ANOVA table	SS	DF	MS	F (DFn, DFd)	P value
F	5.919		Treatment (between columns)	33.29	3	11.1	F (3, 19) = 5.919	P=0.0050
P value	0.005		Residual (within columns)	35.62	19	1.875
P value summary	**		Total	68.91	22
Significant diff. among means (P < 0.05)?	Yes
R square	0.4831
Tukey's multiple comparisons test	Mean Diff.	95.00% CI of diff.	Significant?	Summary	Adjusted P Value
Column A vs. Column B	-2.847	-5.070 to -0.6241	Yes	**	0.0094
Column A vs. Column C	-0.02638	-2.249 to 2.196	No	ns	>0.9999
Column A vs. Column D	-0.4105	-2.742 to 1.921	No	ns	0.9592
Column B vs. Column C	2.82	0.5977 to 5.043	Yes	*	0.0101
Column B vs. Column D	2.436	0.1050 to 4.768	Yes	*	0.0386
Column C vs. Column D	-0.3841	-2.715 to 1.947	No	ns	0.9661
TNFA expression
ANOVA summary			ANOVA table	SS	DF	MS	F (DFn, DFd)	P value
F	4.23		Treatment (between columns)	26.33	3	8.777	F (3, 20) = 4.230	P=0.0181
P value	0.0181		Residual (within columns)	41.5	20	2.075
P value summary	*		Total	67.83	23
Significant diff. among means (P < 0.05)?	Yes
R square	0.3882
Tukey's multiple comparisons test	Mean Diff.	95.00% CI of diff.	Significant?	Summary	Adjusted P Value
Column A vs. Column B	-2.427	-4.755 to -0.09926	Yes	*	0.0391
Column A vs. Column C	0.2269	-2.101 to 2.555	No	ns	0.9927
Column A vs. Column D	-0.4493	-2.777 to 1.878	No	ns	0.9481
Column B vs. Column C	2.654	0.3262 to 4.982	Yes	*	0.0219
Column B vs. Column D	1.978	-0.3500 to 4.305	No	ns	0.114
Column C vs. Column D	-0.6762	-3.004 to 1.652	No	ns	0.8476
Fig. S3E
Iba+ cell diameter (um)			Iba+ cell branch length (um)			Iba+ cell branch points
Unpaired t test			Unpaired t test			Unpaired t test
P value	0.0009		P value	0.0198		P value	0.0236
P value summary	***		P value summary	*		P value summary	*
Significantly different (P < 0.05)?	Yes		Significantly different (P < 0.05)?	Yes		Significantly different (P < 0.05)?	Yes
One- or two-tailed P value?	Two-tailed		One- or two-tailed P value?	Two-tailed		One- or two-tailed P value?	Two-tailed
t, df	t=6.045, df=6		t, df	t=3.152, df=6		t, df	t=3.015, df=6
Fig. S3G
Iba+ cell diameter (um)			Iba+ cell branch length (um)			Iba+ cell branch points
Unpaired t test			Unpaired t test			Unpaired t test
P value	0.0085		P value	0.0969		P value	0.1338
P value summary	**		P value summary	ns		P value summary	ns
Significantly different (P < 0.05)?	Yes		Significantly different (P < 0.05)?	No		Significantly different (P < 0.05)?	No
One- or two-tailed P value?	Two-tailed		One- or two-tailed P value?	Two-tailed		One- or two-tailed P value?	Two-tailed
t, df	t=3.850, df=6		t, df	t=1.966, df=6		t, df	t=1.733, df=6
Fig. S3J
Proximal Large Intestine
IL-6 ELISA			IL-17 ELISA
Unpaired t test			Unpaired t test
P value	0.0158		P value	0.0047
P value summary	*		P value summary	**
Significantly different (P < 0.05)?	Yes		Significantly different (P < 0.05)?	Yes
One- or two-tailed P value?	Two-tailed		One- or two-tailed P value?	Two-tailed
t, df	t=3.165, df=7		t, df	t=4.072, df=7
Fig. S3K
Duodenum
IL-6 ELISA			IL-17 ELISA
Unpaired t test			Unpaired t test
P value	0.2857		P value	0.5496
P value summary	ns		P value summary	ns
Significantly different (P < 0.05)?	No		Significantly different (P < 0.05)?	No
One- or two-tailed P value?	Two-tailed		One- or two-tailed P value?	Two-tailed
t, df	t=1.156, df=7		t, df	t=0.6285, df=7
