# Supplementary material for: A gut bacterial amyloid promotes α-synuclein aggregation and motor impairment in mice
Source: eLife. 2020 Feb 11;9:e53111. doi: 10.7554/eLife.53111 (PMC7012599; doi:10.7554/eLife.53111)
Supplement: Figure 1—source data 1. [file elife-53111-fig1-data1.xlsx]

## Sheet: Figure 1
Figure 1A-E Motor Testing
Mono-colonized Mice		Fig. 1a	Fig. 1b	Fig. 1c	Fig. 1d	Fig. 1e
Colonization	Genotype	Beam Crossing (sec)	Pole Descent (sec)	Adhesive Removal (sec)	Hindlimb Score (0-3)	Wirehang (sec)		Shading Represents Independent Groups
Ecoli WT	WT	2.94	4.71	DNT	0	16.81		PUP- Physically Unable to Perform; Animal Did Not Complete Task
Ecoli WT	WT	2.49	5.28	DNT	0	17.35		DNT- Did Not Test; Cohort was not Tested
Ecoli WT	WT	3.49	4.96	DNT	0	14.59
Ecoli WT	WT	7.26	4.19	3.83	0	26.64
Ecoli WT	WT	1.35	1.45	1.12	0	23.01
Ecoli WT	WT	1.53	3.41	2	1	11.65
Ecoli WT	WT	2.32	1.32	1.12	0	38.19
Ecoli WT	WT	7.25	5.34	1.7	0	45.38
Ecoli WT	WT	4.73	7.31	0.92	0	31.8
Ecoli WT	WT	7.22	4.71	1.09	0	19.79
Ecoli WT	WT	6.29	9.37	1.18	0	48.31
Ecoli WT	WT	7.06	10.58	4.99	0	45.32
Ecoli WT	WT	5.1	3.47	1.02	0	52.07
Ecoli WT	ASO	9.85	30.56	DNT	2	DNT
Ecoli WT	ASO	7.51	17.64	DNT	2	DNT
Ecoli WT	ASO	7.93	20.89	DNT	1	DNT
Ecoli WT	ASO	5.23	7.17	2.05	1	13.36
Ecoli WT	ASO	6.12	7.64	2.92	1	15.01
Ecoli WT	ASO	7.74	7.47	2.36	2	6.79
Ecoli WT	ASO	7.06	13.83	8.35	2	20.12
Ecoli WT	ASO	17.5	4.85	1.97	2	10.91
Ecoli WT	ASO	7.09	9.91	1.77	1	9.26
Ecoli WT	ASO	6.37	PUP	4.62	2	PUP
Ecoli WT	ASO	9.81	13.97	11.19	2	18.27
Ecoli WT	ASO	8.05	5.11	10.14	1	27.54
Ecoli WT	ASO	10.59	8.93	9.85	2	8.03
Ecoli WT	ASO	16.59	22.23	2.11	1	30.12
Ecoli dCsgBAC	WT	2.08	5.08	6.01	1	DNT
Ecoli dCsgBAC	WT	3.8	3.64	2.76	0	DNT
Ecoli dCsgBAC	WT	3.69	6.91	1.6	0	DNT
Ecoli dCsgBAC	WT	4.21	5.67	1.43	0	DNT
Ecoli dCsgBAC	WT	4.84	5.73	1.06	0	DNT
Ecoli dCsgBAC	WT	3.54	4.71	2.91	0	39.51
Ecoli dCsgBAC	WT	13.17	2.06	1.26	0	39.41
Ecoli dCsgBAC	WT	12.65	5.63	1.31	1	23.37
Ecoli dCsgBAC	WT	2.69	5.62	1.64	0	56.98
Ecoli dCsgBAC	WT	PUP	12.69	3.76	0	45.43
Ecoli dCsgBAC	WT	4.25	5.16	1.38	0	44.38
Ecoli dCsgBAC	WT	4.67	4.92	1.29	1	42.85
Ecoli dCsgBAC	WT	2.16	3.88	1.12	0	19.19
Ecoli dCsgBAC	WT	1.83	9.22	8.91	0	43.44
Ecoli dCsgBAC	ASO	5.37	13.15	DNT	1	DNT
Ecoli dCsgBAC	ASO	3.55	8.77	DNT	0	DNT
Ecoli dCsgBAC	ASO	4.15	10.75	DNT	2	DNT
Ecoli dCsgBAC	ASO	5.59	3.51	DNT	0	DNT
Ecoli dCsgBAC	ASO	5.68	12.59	DNT	1	DNT
Ecoli dCsgBAC	ASO	5.1	5.77	4.08	0	21.42
Ecoli dCsgBAC	ASO	7.82	9.3	2.22	0	19.33
Ecoli dCsgBAC	ASO	2.72	3.23	3.14	1	17.51
Ecoli dCsgBAC	ASO	7.21	6.33	0.87	2	13.68
Ecoli dCsgBAC	ASO	3.46	6	1.89	1	10.84
Ecoli dCsgBAC	ASO	5.75	7.26	2.04	0	15.86
Ecoli dCsgBAC	ASO	13.07	12.44	3.31	0	8.48
Ecoli dCsgBAC	ASO	3.08	4.72	1.09	1	19.63
Ecoli dCsgBAC	ASO	2.57	5.21	1.11	0	31.05
Ecoli dCsgBAC	ASO	2.19	8.53	0.68	1	18.66
Ecoli dCsgBAC	ASO	6	8.12	4.74	1	32.21
Fig. 1F
Principle Component Analysis through ClustVis
WT-E. coli			ASO-E. coli			WT-csgBAC			ASO-csgBAC
PC1	PC2		PC1	PC2		PC1	PC2		PC1	PC2
-1.04741	-0.752367		3.74096	1.82678		-0.188018	-0.999345		0.692723	0.248153
-1.06367	-0.72129		2.17911	0.408722		-1.22631	-0.294153		-0.739512	0.131279
-0.907957	-0.781985		1.78605	1.21972		-1.05898	0.055864		1.05867	-0.570086
-0.593834	0.0971993		0.218829	-0.878162		-1.12692	0.00777438		-0.96798	-0.130667
-1.90504	-0.802195		0.45438	-0.708653		-1.07761	0.100376		0.681034	0.230046
-0.62118	-1.69111		1.50766	-1.40218		-1.39009	0.443096		-0.612028	-0.260429
-2.06257	0.042084		2.46739	-0.571448		-0.520628	1.30531		-0.0761677	0.3469
-1.06964	1.25062		2.46447	-0.384706		0.813578	0.302788		-0.453368	-1.35501
-1.06426	0.533072		0.778585	-0.621602		-1.88202	1.37489		1.03002	-1.1356
-0.736895	-0.0462325		1.27258	-0.684785		-0.304752	1.6672		-0.106978	-1.28694
-0.925331	1.68955		3.21308	-0.520245		-1.51362	0.886452		-0.511478	-0.218428
-0.214712	1.51805		1.06888	-0.517707		-0.698899	0.365962		1.26311	0.584865
-1.74198	1.22489		2.86824	-1.32833		-1.49122	-0.686208		-0.53361	-0.961619
			2.91546	2.51343		-0.575899	0.530174		-1.52502	0.0671249
									-0.31721	-0.73511
									0.377998	0.0742169
Fig. 1G
ASO mice, SN
pS129-aSyn per frame
WT	ΔcsgBAC
56	0
39	0
30	14
26	10
16
Fig. 1H
ASO mice, SN
pS129-aSyn per frame TH+ region
WT	ΔcsgBAC
3	0
7	0
6	1
8	0
3
Fig. 1I
ASO mice, SN
Proteinase K resistant synuclein cells per mm^2
WT	ΔcsgBAC
0.313578	0.0489966
0.14699	0.117592
0.411571	0.0783945
0.235181	0.0881938

## Sheet: Figure 1 Statistics
Figure 1A
ANOVA summary			ANOVA table	SS	DF	MS	F (DFn, DFd)	P value
F	6.386		Treatment (between columns)	188.4	3	62.8	F (3, 52) = 6.386	P=0.0009
P value	0.0009		Residual (within columns)	511.4	52	9.835
P value summary	***		Total	699.8	55
Significant diff. among means (P < 0.05)?	Yes
R square	0.2692
Tukey's multiple comparisons test	Mean Diff.	95.00% CI of diff.	Significant?	Summary	Adjusted P Value
Column A vs. Column B	-4.562	-7.768 to -1.356	Yes	**	0.0023
Column A vs. Column C	-0.35	-3.615 to 2.915	No	ns	0.9919
Column A vs. Column D	-0.6661	-3.774 to 2.442	No	ns	0.9409
Column B vs. Column C	4.212	1.006 to 7.418	Yes	**	0.0054
Column B vs. Column D	3.896	0.8499 to 6.942	Yes	**	0.007
Column C vs. Column D	-0.3161	-3.424 to 2.792	No	ns	0.993
Figure 1B
ANOVA summary			ANOVA table	SS	DF	MS	F (DFn, DFd)	P value
F	8.518		Treatment (between columns)	516.5	3	172.2	F (3, 52) = 8.518	P=0.0001
P value	0.0001		Residual (within columns)	1051	52	20.21
P value summary	***		Total	1567	55
Significant diff. among means (P < 0.05)?	Yes
R square	0.3295
Tukey's multiple comparisons test	Mean Diff.	95.00% CI of diff.	Significant?	Summary	Adjusted P Value
Column A vs. Column B	-8.008	-12.69 to -3.327	Yes	***	0.0002
Column A vs. Column C	-0.6954	-5.291 to 3.900	No	ns	0.9779
Column A vs. Column D	-2.77	-7.226 to 1.685	No	ns	0.3601
Column B vs. Column C	7.312	2.716 to 11.91	Yes	***	0.0005
Column B vs. Column D	5.237	0.7819 to 9.693	Yes	*	0.0152
Column C vs. Column D	-2.075	-6.442 to 2.292	No	ns	0.5914
Figure 1C
ANOVA summary			ANOVA table	SS	DF	MS	F (DFn, DFd)	P value
F	4.121		Treatment (between columns)	73.76	3	24.59	F (3, 42) = 4.121	P=0.0119
P value	0.0119		Residual (within columns)	250.6	42	5.967
P value summary	*		Total	324.4	45
Significant diff. among means (P < 0.05)?	Yes
R square	0.2274
Tukey's multiple comparisons test	Mean Diff.	95.00% CI of diff.	Significant?	Summary	Adjusted P Value
Column A vs. Column B	-3.315	-6.170 to -0.4598	Yes	*	0.0172
Column A vs. Column C	-0.7059	-3.411 to 2.000	No	ns	0.8973
Column A vs. Column D	-0.3912	-3.246 to 2.464	No	ns	0.9829
Column B vs. Column C	2.609	-0.02374 to 5.242	No	ns	0.0529
Column B vs. Column D	2.924	0.1374 to 5.710	Yes	*	0.0365
Column C vs. Column D	0.3147	-2.318 to 2.947	No	ns	0.9885
D
ANOVA summary			ANOVA table	SS	DF	MS	F (DFn, DFd)	P value
F	23.52		Treatment (between columns)	18.84	3	6.279	F (3, 53) = 23.52	P<0.0001
P value	<0.0001		Residual (within columns)	14.15	53	0.2669
P value summary	****		Total	32.98	56
Significant diff. among means (P < 0.05)?	Yes
R square	0.5711
Tukey's multiple comparisons test	Mean Diff.	95.00% CI of diff.	Significant?	Summary	Adjusted P Value
Column A vs. Column B	-1.495	-2.022 to -0.9667	Yes	****	<0.0001
Column A vs. Column C	-0.1374	-0.6652 to 0.3904	No	ns	0.9004
Column A vs. Column D	-0.6106	-1.122 to -0.09890	Yes	*	0.0133
Column B vs. Column C	1.357	0.8392 to 1.875	Yes	****	<0.0001
Column B vs. Column D	0.8839	0.3824 to 1.385	Yes	***	0.0001
Column C vs. Column D	-0.4732	-0.9747 to 0.02828	No	ns	0.071
Figure 1E
ANOVA summary			ANOVA table	SS	DF	MS	F (DFn, DFd)	P value
F	9.513		Treatment (between columns)	3385	3	1128	F (3, 39) = 9.513	P<0.0001
P value	<0.0001		Residual (within columns)	4626	39	118.6
P value summary	****		Total	8012	42
Significant diff. among means (P < 0.05)?	Yes
R square	0.4225
Tukey's multiple comparisons test	Mean Diff.	95.00% CI of diff.	Significant?	Summary	Adjusted P Value
Column A vs. Column B	14.13	1.836 to 26.42	Yes	*	0.0188
Column A vs. Column C	-9.326	-22.00 to 3.348	No	ns	0.215
Column A vs. Column D	11.1	-0.8731 to 23.07	No	ns	0.0777
Column B vs. Column C	-23.45	-36.88 to -10.03	Yes	***	0.0002
Column B vs. Column D	-3.029	-15.80 to 9.741	No	ns	0.9196
Column C vs. Column D	20.43	7.289 to 33.56	Yes	***	0.0009
Figure 1G
Unpaired t test
P value	0.0129
P value summary	*
Significantly different (P < 0.05)?	Yes
One- or two-tailed P value?	Two-tailed
t, df	t=3.314, df=7
Figure 1H
Unpaired t test
P value	0.0034
P value summary	**
Significantly different (P < 0.05)?	Yes
One- or two-tailed P value?	Two-tailed
t, df	t=4.335, df=7
Figure 1I
Unpaired t test
P value	0.0158
P value summary	*
Significantly different (P < 0.05)?	Yes
One- or two-tailed P value?	Two-tailed
t, df	t=3.331, df=6
