# Supplementary material for: A gut bacterial amyloid promotes α-synuclein aggregation and motor impairment in mice
Source: eLife. 2020 Feb 11;9:e53111. doi: 10.7554/eLife.53111 (PMC7012599; doi:10.7554/eLife.53111)
Supplement: Figure 2—figure supplement 1—source data 1. [file elife-53111-fig2-figsupp1-data1.xlsx]

## Sheet: Fig 2, fig supp 1
Fig. S1A
log2[csgA] abundance PICRUSt
HC	PD
-19.6885	-19.0057
-19.3771	-20.5314
-18.8026	-17.4339
-23.7928	-19.3173
-23.1681	-22.0928
Fig. S1B
Relative abundance rrsA in feces
WT	ΔcsgBAC
1.38912e+07	2.05043e+07
3.58824e+08	3104398267
5.12215e+06	193930000000
6.67696e+07	4.92381e+06
8.29741e+06	8.91304e+06
4.31558e+07	1.36418e+07
1.04665e+08	1.13745e+07
1.49038e+07	1.13802e+08
Fig. S1C
% cfu YESCA agar / cfu Brucella Blood agar
WT	ΔcsgBAC
2	3.63636
3.63636	0.875
0.55	1
2.28571	1.33333
Fig. S1D
% cfu Congo Red+ / cfu Brucella Blood agar
WT	ΔcsgBAC
1.66667	0
0.909091	0
0.35	0
1.57143	0
Fig. S1E
Relative expression csgA in feces
WT	ΔcsgBAC
246.34	14.8559
167.313	180.619
2386.81	9.8
264.913	41.6415
122.394	9.87474
369.919	15.6837
1222.21	30.1738
6533.65	4.7295
Fig. S1G
pS129-aSyn per frame, TH+ region
WT	ΔcsgBAC
2	0
7	1
3	1
2	3
Fig. S1H
TH+ cells per frame SN
WT	ΔcsgBAC
129	81
189	115
59	47
130	151
Fig. S1I
Midbrain synuclein fibril density
WT	ΔcsgBAC
0.806793	0.16099
1.06877	0.379422
0.742121	0.447682
0.60816	0.118537
Fig. S1J
Striatum synuclein fibril density
WT	ΔcsgBAC
0.35448	0.42343
0.476622	0.25921
0.407867	0.34584
0.347194	0.426031
Fig. S1L
ASO mice, SN
Iba+ cell diameter (um)			Iba+ cell branch length (um)			Iba+ cell branch points
WT	ΔcsgBAC		WT	ΔcsgBAC		WT	ΔcsgBAC
5.49	4.81		869.6	1015.8		68.6	87.8
5.45	5.18		832.7	763.6		58.2	57.6
5.48	4.52		659.9	943.8		45.2	63.3
Fig. S1M
ASO mice, Striatum
Iba+ cell diameter (um)			Iba+ cell branch length (um)			Iba+ cell branch points
WT	ΔcsgBAC		WT	ΔcsgBAC		WT	ΔcsgBAC
4.27	4.48		1055.8	1888.5		87.7	151.5
4.87	4.68		937.2	1104.1		58.5	84.3
5.16	4.86		1015.6	1545		66.3	107.2

## Sheet: Fig 2, fig supp 1 Statistics
Fig. S4B
Mann Whitney test
P value	0.9591
Exact or approximate P value?	Exact
P value summary	ns
Significantly different (P < 0.05)?	No
One- or two-tailed P value?	Two-tailed
Sum of ranks in column A,B	67 , 69
Mann-Whitney U	31
Fig. S4E
Mann Whitney test
P value	0.0006
Exact or approximate P value?	Exact
P value summary	***
Significantly different (P < 0.05)?	Yes
One- or two-tailed P value?	Two-tailed
Sum of ranks in column A,B	98 , 38
Mann-Whitney U	2
Fig. S4L
Unpaired t test
P value	0.0292
P value summary	*
Significantly different (P < 0.05)?	Yes
One- or two-tailed P value?	Two-tailed
t, df	t=3.327, df=4
