# Supplementary material for: A gut bacterial amyloid promotes α-synuclein aggregation and motor impairment in mice
Source: eLife. 2020 Feb 11;9:e53111. doi: 10.7554/eLife.53111 (PMC7012599; doi:10.7554/eLife.53111)
Supplement: Figure 2—source data 1. [file elife-53111-fig2-data1.xlsx]

## Sheet: Figure 2
Figure 2A-H
E. coli enriched, humanized microbiome colonized ASO mice
Fig. 2A-Beam Crossing (sec)
Age (wks)	WT
12	3.61	5.78	8.8	2.49	5.34	17.36	2.35	3.99	3.18	8.93	4.19	5.37			Shading Represents Independent Groups
15	8.56	5.46	PUP	3.42	3.08	14.52	8.55	5.5	20.84	10.49	26.58	4.95			PUP- Physically Unable to Perform; Animal Did Not Complete Task
20	12.65	9.92	32.55	7.57	13.05	16.93	9.49	23.78	6.59	8.3	10.81	10.64			DNT- Did Not Test; Cohort was not Tested
Age (wks)	ΔcsgBAC
12	5.36	3.74	5.64	7.76	10.48	5.68	2.92	2.32	1.8	7.83	6.41	1.65
15	9.99	PUP	4.22	2.92	5.06	2.53	5.35	4.6	3.82	10.03	5	3.24
20	3.77	13	7.3	5.26	9.72	5.89	4.66	2.93	10.17	12.2	7.41	4.89
Fig. 2B-Pole descent (sec)
Age (wks)	WT
12	4.77	5.34	2.66	4.19	6.65	6.83	3.34	3.52	4.39	6.08	3.02	4.98
15	5.37	5.84	3.31	2.89	5.95	4.85	4.42	4.95	5.35	6.61	3.34	4.74
20	7.1	2.42	7.72	5.33	6.47	6.68	3.1	6.15	6.96	9.35	3.57	4.01
Age (wks)	ΔcsgBAC
12	2.79	6.28	3.39	3.22	7.32	3.72	4.26	5.05	4.09	4.89	3.82	3.7
15	3.49	7.21	3.29	2.81	7.62	2.81	3.63	4.49	3.04	4.96	3.84	4.37
20	3.24	11.27	3.78	3.08	7.84	7.61	3.77	3.37	3.67	6.84	5.32	4.24
Fig. 2C-Adhesive removal (sec)
Age (wks)	WT
12	11.84	3.21	5.46	3.02	3.57	4.99	1.27	4.59	8.25	5.49	4.18	7.32
15	20.07	6.37	13.49	7.56	3.93	5.26	5.4	18.09	11.49	6.75	1.74	50.29
20	17.07	2.5	6.535	31.22	13.44	9.21	4.34	8.32	6.115	3.32	2.29	3.93
Age (wks)	ΔcsgBAC
12	1.22	1.14	4.34	1.3	18.34	1.23	7.41	5.53	3.79	1.99	2.42	1.14
15	2.89	5.51	3.65	3.22	36.57	0.83	2.02	1.53	2.91	5.91	6.29	0.77
20	6.05	1.57	2.12	0.95	8.37	1.04	4.41	2.33	2.78	7.64	6.26	1.18
Fig. 2D- Hindlimb score (0-3)
Age (wks)	WT
12	2	2	1	1	1	2	1	1	2	1	1	2
15	2	2	1	1	2	2	1	2	3	2	2	2
20	2	1	1	2	2	2	2	2	3	2	3	2
Age (wks)	ΔcsgBAC
12	1	1	1	0	1	1	2	0	1	2	0	0
15	2	1	1	1	2	1	2	0	1	2	1	0
20	1	2	0	1	2	1	3	1	1	2	2	1
Fig. 2E- Wirehang (sec)
Age (wks)	WT
12	9.98	14.32	2.65	16.41	7.89	3.18	9.23	1.75	15.6	3.77	9.23	11.08
15	8.26	28.92	7.84	6.9	8.33	2.18	8.89	4.01	17.98	20.96	16.49	11.42
20	11.82	10.46	3.89	6.75	12.74	11.78	6.61	7.85	16.81	7.37	14.09	8.73
Age (wks)	ΔcsgBAC
12	19.58	18.65	28.33	16.29	19.24	60	12.12	3.86	20.41	14.955	7.06	39.39
15	20.47	30.29	22.34	12.91	11.42	60	11.39	7.7	8.16	13.88	7.29	51.41
20	25.81	23.93	37.28	22.15	11.09	60	14.33	5.49	9.42	14.4	5.49	39.07
Fig. 2F
Principle Component Analysis through ClustVis
	WT- 12wk			ΔcsgBAC- 12wk			WT- 20wk			ΔcsgBAC- 20wk
	PC1	PC2		PC1	PC2		PC1	PC2		PC1	PC2
	0.596853	1.00805		-1.48336	0.317088		2.30567	0.0318232		-1.28258	0.188764
	0.0987881	0.0230183		-0.741114	-0.606797		-0.838859	0.758416		1.77046	-2.73824
	-0.42017	1.32494		-1.29639	-0.180208		2.87473	-1.41447		-2.09898	-1.08936
	-1.14679	0.30958		-1.69335	0.143295		2.733	1.86567		-1.51231	0.0815052
	-0.0247307	-0.0873003		1.46527	-0.35946		1.86356	-0.0454919		1.55346	-0.475945
	1.88676	-0.316603		-2.32746	-2.15839		1.923	-0.483918		-1.36727	-3.35188
	-1.31479	0.864926		-0.00561391	0.840645		0.160736	0.986965		0.329074	0.721863
	-0.658722	1.31117		-1.01675	0.768035		2.40246	-0.508416		-1.07054	1.08571
	0.0218447	0.646272		-1.27563	0.200922		1.34807	-0.378691		-0.458895	0.440252
	0.404956	0.22874		0.0435553	-0.0459733		1.49628	-0.932868		1.36593	-0.518597
	-1.00215	1.02612		-1.31643	0.589545		0.630377	0.367621		0.719551	0.588174
	0.398503	0.550424		-2.73053	-0.945429		0.390334	0.517697		-1.6998	-1.14918
Fig 2G
E. coli enriched, humanized microbiome colonized ASO mice
Fecal output (pellet per mouse)
Time (min)	WT
0	0	0	0	0	0	0	0	0
5	0	5	0	0	2	0	0	3
10	2	5	0	3	2	0	2	5
15	3	6	0	4	4	5	2	5
Time (min)	ΔcsgBAC
0	0	0	0	0	0	0	0	0
5	0	5	0	1	3	5	4	6
10	3	8	4	5	5	8	4	6
15	4	8	5	8	7	11	5	6
Fig. 2H
pS129-aSyn per frame, SN
WT	ΔcsgBAC
19	6
48	18
31	15
36	20

## Sheet: Figure 2 Statistics
Fig. 2A
Two-way ANOVA
Source of Variation	% of total variation	P value	P value summary	Significant?		ANOVA table	SS (Type III)	DF	MS	F (DFn, DFd)	P value
Interaction	4.158	0.1645	ns	No		Interaction	97.05	2	48.52	F (2, 64) = 1.857	P = 0.1645
Row Factor (Age)	12.17	0.0066	**	Yes		Row Factor (Age)	284.1	2	142.1	F (2, 64) = 5.435	P = 0.0066
Column Factor (Colonization)	12.16	0.0016	**	Yes		Column Factor (Colonization)	283.8	1	283.8	F (1, 64) = 10.86	P = 0.0016
						Residual	1673	64	26.14
Sidak's multiple comparisons test	Predicted (LS) mean diff.	95.00% CI of diff.	Significant?	Summary	Adjusted P Value
WT - ΔcsgBAC
12wks	0.8167	-4.301 to 5.934	No	ns	0.9721
15wks	5.017	-0.3275 to 10.36	No	ns	0.0721
20wks	6.257	1.139 to 11.37	Yes	*	0.0116
Fig. 2B
Two-way ANOVA
Source of Variation	% of total variation	P value	P value summary	Significant?		ANOVA table	SS	DF	MS	F (DFn, DFd)	P value
Interaction	0.07529	0.9732	ns	No		Interaction	0.1666	2	0.08329	F (2, 66) = 0.02720	P = 0.9732
Row Factor (Age)	7.33	0.0783	ns	No		Row Factor (Age)	16.22	2	8.108	F (2, 66) = 2.648	P = 0.0783
Column Factor (Colonization)	1.253	0.3447	ns	No		Column Factor (Colonization)	2.773	1	2.773	F (1, 66) = 0.9057	P = 0.3447
						Residual	202.1	66	3.062
Sidak's multiple comparisons test	Mean Diff.	95.00% CI of diff.	Significant?	Summary	Adjusted P Value
WT - ΔcsgBAC
12wks	0.27	-1.480 to 2.020	No	ns	0.9748
15wks	0.505	-1.245 to 2.255	No	ns	0.8611
20wks	0.4025	-1.348 to 2.153	No	ns	0.9233
Fig. 2C
Two-way ANOVA
Source of Variation	% of total variation	P value	P value summary	Significant?		ANOVA table	SS	DF	MS	F (DFn, DFd)	P value
Interaction	1.998	0.4678	ns	No		Interaction	96.77	2	48.39	F (2, 66) = 0.7685	P = 0.4678
Row Factor (Age)	5.284	0.1392	ns	No		Row Factor (Age)	255.9	2	127.9	F (2, 66) = 2.032	P = 0.1392
Column Factor (Colonization)	6.914	0.0243	*	Yes		Column Factor (Colonization)	334.8	1	334.8	F (1, 66) = 5.318	P = 0.0243
						Residual	4155	66	62.96
Sidak's multiple comparisons test	Mean Diff.	95.00% CI of diff.	Significant?	Summary	Adjusted P Value
WT - ΔcsgBAC
12wks	1.112	-6.824 to 9.048	No	ns	0.9809
15wks	6.528	-1.408 to 14.46	No	ns	0.1371
20wks	5.299	-2.637 to 13.24	No	ns	0.287
Fig. 2D
Two-way ANOVA
Source of Variation	% of total variation	P value	P value summary	Significant?		ANOVA table	SS	DF	MS	F (DFn, DFd)	P value
Interaction	0.06983	0.9687	ns	No		Interaction	0.02778	2	0.01389	F (2, 66) = 0.03179	P = 0.9687
Row Factor (Age)	10.54	0.0113	*	Yes		Row Factor (Age)	4.194	2	2.097	F (2, 66) = 4.801	P = 0.0113
Column Factor (Colonization)	16.9	0.0002	***	Yes		Column Factor (Colonization)	6.722	1	6.722	F (1, 66) = 15.39	P = 0.0002
						Residual	28.83	66	0.4369
Sidak's multiple comparisons test	Mean Diff.	95.00% CI of diff.	Significant?	Summary	Adjusted P Value
WT - ΔcsgBAC
12wks	0.5833	-0.07772 to 1.244	No	ns	0.0993
15wks	0.6667	0.005611 to 1.328	Yes	*	0.0475
20wks	0.5833	-0.07772 to 1.244	No	ns	0.0993
Fig. 2E
Two-way ANOVA
Source of Variation	% of total variation	P value	P value summary	Significant?		ANOVA table	SS	DF	MS	F (DFn, DFd)	P value
Interaction	0.3119	0.8793	ns	No		Interaction	38.8	2	19.4	F (2, 66) = 0.1289	P = 0.8793
Row Factor (Age)	0.2049	0.9189	ns	No		Row Factor (Age)	25.48	2	12.74	F (2, 66) = 0.08469	P = 0.9189
Column Factor (Colonization)	19.64	0.0001	***	Yes		Column Factor (Colonization)	2443	1	2443	F (1, 66) = 16.24	P = 0.0001
						Residual	9931	66	150.5
Sidak's multiple comparisons test	Mean Diff.	95.00% CI of diff.	Significant?	Summary	Adjusted P Value
WT - ΔcsgBAC
12wks	-12.9	-25.17 to -0.6315	Yes	*	0.0363
15wks	-9.59	-21.86 to 2.678	No	ns	0.1689
20wks	-12.46	-24.73 to -0.1952	Yes	*	0.0453
Fig. 2G
Two-way ANOVA
Source of Variation	% of total variation	P value	P value summary	Significant?		ANOVA table	SS	DF	MS	F (DFn, DFd)	P value
Interaction	4.996	0.056	ns	No		Interaction	25.3	3	8.432	F (3, 56) = 2.674	P=0.0560
Row Factor (Time)	47.88	<0.0001	****	Yes		Row Factor	242.4	3	80.81	F (3, 56) = 25.62	P<0.0001
Column Factor (Colonization)	12.25	<0.0001	****	Yes		Column Factor	62.02	1	62.02	F (1, 56) = 19.66	P<0.0001
						Residual	176.6	56	3.154
Sidak's multiple comparisons test	Mean Diff.	95.00% CI of diff.	Significant?	Summary	Adjusted P Value
WT - ΔcsgBAC
0 min	0	-2.285 to 2.285	No	ns	>0.9999
5 min	-1.75	-4.035 to 0.5352	No	ns	0.1981
10 min	-3	-5.285 to -0.7148	Yes	**	0.0053
15 min	-3.125	-5.410 to -0.8398	Yes	**	0.0035
Fig. 2J
Unpaired t test
P value	0.0322
P value summary	*
Significantly different (P < 0.05)?	Yes
One- or two-tailed P value?	Two-tailed
t, df	t=2.775, df=6
