# Supplementary material for: A gut bacterial amyloid promotes α-synuclein aggregation and motor impairment in mice
Source: eLife. 2020 Feb 11;9:e53111. doi: 10.7554/eLife.53111 (PMC7012599; doi:10.7554/eLife.53111)
Supplement: Figure 3—figure supplement 1—source data 1. [file elife-53111-fig3-figsupp1-data1.xlsx]

## Sheet: Fig 3, fig supp 1
Fig. S1A
Circular dichroism spectroscopy
0hr timepoint						12.5hr timepoint					60hr timepoint
Wavelength (nm)	Buffer	CsgA	aSyn	aSyn:CsgA		Wavelength (nm)	CsgA	aSyn	aSyn:CsgA		Wavelength (nm)	Buffer	CsgA	aSyn	aSyn:CsgA
250	0.7323	0.54698	0.28141	0.42758		250	1.62078	-0.475692	0.222982		250	2.40823	2.29904	1.57819	0.05953
249	0.67252	0.55078	0.26192	0.24955		249	1.51974	-0.588845	0.1654		249	2.68818	2.65964	1.63901	0.16151
248	0.73903	0.71549	0.38232	0.238		248	1.44509	-0.779388	0.215971		248	2.48362	2.57072	1.1978	-0.09481
247	0.87599	0.62353	0.2333	0.15301		247	1.32223	-0.945516	0.228334		247	2.58003	2.47595	1.17571	-0.34771
246	0.76276	0.58499	0.07825	0.09885		246	1.23439	-1.16754	0.231914		246	2.59606	2.61281	0.99955	-0.75269
245	0.62953	0.57674	0.03777	-0.0771		245	1.02348	-1.47106	0.2328		245	2.3524	2.48822	0.44467	-0.91943
244	0.75214	0.70158	-0.05507	-0.13675		244	0.865115	-1.88701	0.200492		244	2.29933	2.4323	0.10273	-1.31295
243	0.73886	0.67652	-0.27469	-0.2702		243	0.61378	-2.14733	0.228657		243	1.96741	2.17905	-0.31694	-2.11133
242	0.81488	0.70683	-0.44916	-0.58385		242	0.363635	-2.7477	0.240799		242	2.24909	2.26453	-0.71281	-2.16661
241	0.67483	0.60058	-0.64213	-0.87488		241	0.0248696	-3.3319	0.204151		241	2.21116	2.34938	-1.57367	-2.71543
240	0.68108	0.66555	-0.79321	-1.05969		240	-0.336809	-4.0076	0.232325		240	2.2715	2.42057	-2.24823	-3.26703
239	0.74851	0.71026	-1.12134	-1.39067		239	-0.681412	-4.94589	0.251321		239	2.03092	2.38616	-2.97385	-4.29985
238	0.75185	0.71421	-1.53272	-1.67554		238	-1.17474	-5.77767	0.225672		238	2.40753	2.22927	-4.01325	-5.15721
237	0.86241	0.71532	-1.55887	-2.09684		237	-1.5697	-6.80985	0.251175		237	1.78236	2.14808	-5.05989	-6.00538
236	0.86687	0.62752	-1.95298	-2.25166		236	-2.0074	-7.83223	0.270298		236	2.10257	2.41412	-6.23557	-7.00113
235	0.73307	0.53178	-2.2012	-2.62342		235	-2.45199	-9.01537	0.279756		235	2.15879	2.15733	-7.14072	-8.25646
234	0.9025	0.69573	-2.66286	-2.99271		234	-2.95029	-10.1679	0.312242		234	2.24641	2.09158	-8.33077	-8.94767
233	0.91187	0.74172	-2.891	-3.42205		233	-3.40653	-11.3659	0.304512		233	1.97312	2.2286	-9.36453	-9.90453
232	1.00593	0.6654	-3.31088	-3.75945		232	-3.88609	-12.7473	0.377187		232	2.16115	2.16222	-10.6266	-11.5034
231	0.85703	0.85603	-3.58961	-4.10589		231	-4.28051	-13.713	0.332581		231	2.43278	2.32205	-11.335	-12.2937
230	1.10711	0.72704	-3.94676	-4.38875		230	-4.73334	-14.8662	0.371684		230	2.1871	2.17223	-12.5044	-13.3585
229	1.05676	0.81834	-4.16876	-4.79449		229	-5.05287	-15.9634	0.361473		229	2.14567	2.07934	-13.3255	-14.3996
228	1.18954	0.85028	-4.29893	-5.02147		228	-5.41304	-17.0304	0.469163		228	1.79307	1.99652	-14.2777	-15.727
227	1.18063	0.86798	-4.59314	-5.36156		227	-5.67505	-17.9526	0.412512		227	2.27094	1.87876	-14.5298	-16.3276
226	1.17924	0.93482	-4.76921	-5.56867		226	-5.96204	-18.6548	0.476864		226	2.3129	2.21117	-14.6323	-16.5493
225	1.26556	1.01333	-4.7795	-5.62298		225	-6.15181	-19.3937	0.508588		225	1.54548	1.73472	-15.1375	-17.4839
224	1.21734	1.04394	-4.72186	-5.87035		224	-6.29903	-19.7692	0.504799		224	1.5693	1.66875	-15.5925	-18.202
223	1.293	1.02285	-5.03966	-5.8826		223	-6.25821	-20.3159	0.537489		223	1.34231	1.37806	-15.3258	-18.1095
222	1.29058	1.00533	-4.97876	-5.86493		222	-6.45597	-20.5642	0.56813		222	1.30191	1.60085	-14.6481	-18.5962
221	1.55217	1.02758	-5.01006	-5.94256		221	-6.44946	-20.5479	0.513315		221	1.41691	1.42887	-14.4595	-18.4036
220	1.46117	1.17556	-5.04241	-6.22556		220	-6.73149	-20.7239	0.626207		220	1.72399	1.67781	-13.7109	-17.7657
219	1.55844	1.09415	-5.31576	-6.32023		219	-6.49731	-20.3125	0.656613		219	1.6301	1.66079	-13.718	-17.3387
218	1.25895	1.08266	-5.2275	-6.41343		218	-6.73151	-19.6447	0.569036		218	1.63409	1.48895	-12.6603	-16.6354
217	1.53354	1.22253	-5.78012	-6.56627		217	-7.03055	-18.9873	0.695109		217	1.59877	1.95479	-10.336	-14.9695
216	1.501	1.19556	-5.95368	-6.86067		216	-7.3937	-18.3757	0.706912		216	1.35173	1.61988	-9.73557	-14.8849
215	1.65718	1.24137	-6.09023	-7.85712		215	-8.02821	-17.3691	0.693071		215	1.98204	2.00908	-8.14473	-13.1216
214	1.31531	1.22988	-7.21391	-8.13109		214	-8.87573	-16.731	0.784518		214	1.76606	2.05226	-6.99312	-11.9418
213	1.4015	1.27172	-7.70474	-8.89291		213	-9.8955	-16.0759	0.857998		213	1.77857	2.02434	-6.65288	-11.0905
212	1.54737	1.1855	-9.21316	-10.4712		212	-11.4379	-15.2216	0.896544		212	1.41892	1.70158	-6.03338	-10.5788
211	1.60513	1.33543	-10.6855	-11.8674		211	-13.3502	-15.1579	0.87731		211	2.01734	2.06751	-4.9916	-9.90803
210	1.74744	1.14771	-12.419	-14.5244		210	-15.618	-14.6111	0.905096		210	2.24148	2.05864	-3.74454	-8.61729
209	1.52838	0.9712	-15.0457	-16.9552		209	-18.6102	-14.8411	0.864425		209	2.0469	2.09723	-3.35724	-8.25077
208	1.67922	0.94002	-18.229	-19.9675		208	-22.2241	-15.1067	0.987152		208	2.33954	2.84476	-3.15701	-7.4541
207	1.65211	0.93883	-21.2655	-23.7577		207	-26.2222	-16.0046	0.899283		207	2.46861	2.44964	-2.14994	-7.67141
206	1.62285	1.1267	-25.6914	-27.5107		206	-30.3804	-16.826	0.954405		206	2.66906	2.94572	-2.54012	-7.53428
205	1.59966	0.99208	-29.3227	-31.8749		205	-34.7821	-17.8158	0.902632		205	2.96587	2.32229	-2.2616	-5.9788
204	1.52022	1.12559	-32.8022	-36.3591		204	-39.4419	-19.5659	0.919414		204	2.88322	2.78661	-1.32297	-5.82053
203	1.60833	0.48529	-37.3443	-40.6855		203	-44.7823	-21.3828	0.942699		203	2.975	2.81366	-0.53356	-5.56415
202	1.16952	0.60326	-41.806	-45.9633		202	-47.9078	-22.6198	0.906963		202	3.15783	2.28904	-2.00227	-6.18215
201	1.3469	0.46575	-43.9485	-48.6812		201	-50.4453	-22.9898	0.958376		201	2.53004	2.58717	-1.68758	-4.65866
200	1.40819	0.22063	-47.4917	-44.7962		200	-45.5814	-25.8207	0.952179		200	2.40057	2.43565	-1.05291	-4.18055
199	1.734	0.39467	-44.6797	-40.6332		199	-38.2771	-23.1686	1.1541		199	2.34335	2.0713	-0.86599	-2.10518
198	1.21755	0.63243	-36.6184	-27.4679		198	-25.9876	-19.5021	0.880473		198	2.36801	2.34266	-0.71289	-0.91157
197	1.51656	0.51155	-25.7487	-21.0795		197	-12.1129	-16.7657	1.58806		197	0.79783	0.79758	-1.44626	-0.91107
196	1.11042	0.05137	-15.8613	-9.14642		196	-2.84008	-5.75417	1.36361		196	1.22596	1.18617	-0.04527	-0.19973
195	1.18949	0.07282	-0.82588	-6.49628		195	-1.52344	-4.16094	1.24578		195	0.32553	-0.03177	-0.10899	-0.16156
Fig. S1E
Normalized Thioflavin T fluorescence
Time (hrs)	Tau(K18)			Tau(K18):CsgA
0	0.0995366	0.078322	0.0886544	0.0874157	0.0684621	0.0822112
0.5	0.0916888	0.0666458	0.0815754	0.0683008	0.0664502	0.0727569
1	0.0926157	0.0662251	0.0809389	0.0900411	0.0768956	0.0736266
1.5	0.120603	0.0667381	0.0819431	0.16327	0.110216	0.0763421
2	0.227106	0.0872639	0.0960588	0.307369	0.169769	0.0858278
2.5	0.369528	0.123365	0.146694	0.474142	0.257798	0.120792
3	0.51489	0.191986	0.234804	0.637644	0.359681	0.182293
3.5	0.625481	0.290351	0.337765	0.757297	0.468052	0.276286
4	0.689379	0.406241	0.427537	0.839129	0.56851	0.381091
4.5	0.730502	0.504176	0.519487	0.906076	0.659109	0.488969
5	0.774071	0.594369	0.596607	0.929129	0.717863	0.567107
5.5	0.812208	0.670731	0.666521	0.953409	0.775612	0.654599
6	0.830434	0.738449	0.715664	0.987024	0.824139	0.716137
6.5	0.856043	0.797451	0.763322	0.988544	0.857599	0.766062
7	0.887374	0.820706	0.794686	0.991543	0.86971	0.804962
7.5	0.874345	0.866124	0.814509	0.975912	0.885107	0.82464
8	0.873539	0.882725	0.826524	0.990236	0.901375	0.855613
8.5	0.931984	0.90817	0.868864	0.985136	0.924692	0.880578
9	0.90528	0.910797	0.888942	0.985606	0.925413	0.893937
9.5	0.914237	0.91031	0.894833	0.986742	0.937971	0.904918
10	0.912193	0.917061	0.893178	0.999662	0.941855	0.92332
10.5	0.935896	0.938987	0.923389	0.987883	0.9505	0.922557
11	0.922951	0.936473	0.9294	0.988534	0.940804	0.950125
11.5	0.927175	0.939721	0.938148	0.978901	0.948572	0.954943
12	0.946418	0.957728	0.932272	0.985606	0.964159	0.959342
12.5	0.964051	0.958887	0.948141	0.991972	0.959336	0.965386
13	0.969202	0.958066	0.945362	0.980426	0.976991	0.953179
13.5	0.946919	0.970173	0.959555	1	0.986956	0.960712
14	0.958839	0.977089	0.943778	0.995193	0.972844	0.973902
14.5	0.94948	0.967275	0.945051	0.983733	0.980518	0.979596
15	0.97401	0.977684	0.95633	0.979926	0.990717	0.971968
15.5	0.988802	0.983491	0.962872	0.979244	1.00031	0.973276
16	0.987336	0.980808	0.995743	0.988302	0.999698	0.985384
16.5	0.966034	0.96235	0.963091	0.980052	0.997608	0.98029
17	0.974687	1	0.975962	0.995966	1.00431	0.986754
17.5	1	0.986025	0.992645	0.976543	1.01373	0.989157
18	0.970896	0.986908	0.992822	0.990034	1.01501	1
18.5	0.97648	0.982588	0.985092	0.992376	1.00021	0.997247
19	0.999225	0.991233	1	0.99222	1	0.991128
Fig. S1F
Lag phase (hrs)
Tau(K18)	Tau(K18)+CsgA
2.03185	1.19936
0.16626	0.67982
1.25615	1.88599
Fig. S1G
Time to half-max (hrs)
Tau(K18)	Tau(K18)+CsgA
3.07	2.89
4.62	3.75
4.42	4.58
