# Supplementary material for: A gut bacterial amyloid promotes α-synuclein aggregation and motor impairment in mice
Source: eLife. 2020 Feb 11;9:e53111. doi: 10.7554/eLife.53111 (PMC7012599; doi:10.7554/eLife.53111)
Supplement: Figure 3—figure supplement 2—source data 1. [file elife-53111-fig3-figsupp2-data1.xlsx]

## Sheet: Fig 3 fig supp 2
Fig. S2A
Normalized Thioflavin T fluorescence
Time (hrs)	αSyn			αSyn:CsgA(SlowGo)
0	0.00134155	0.00111009	0.00217365	0.00166066	0.00163632	0.00258649
1	0.00138947	0.000891309	0.00201264	0.00145308	0.00157682	0.00230936
2	0.00145335	0.000907514	0.00197239	0.00133985	0.00166607	0.00244792
3	0.00140544	0.000956131	0.00193213	0.00150969	0.0023206	0.00212461
4	0.00135752	0.00101285	0.00197239	0.00149082	0.00389742	0.00235555
5	0.00138947	0.00141799	0.00185163	0.00135872	0.00499822	0.00230936
6	0.00174083	0.0020176	0.00193213	0.00149082	0.0101154	0.00240174
7	0.00239563	0.00273065	0.00201264	0.00162292	0.0182673	0.00235555
8	0.00303447	0.00339508	0.00181138	0.00224566	0.0149351	0.00235555
9	0.0037851	0.00401899	0.00193213	0.00234002	0.0362966	0.00221699
10	0.00448781	0.00560714	0.00201264	0.00322696	0.0402237	0.00221699
11	0.00535024	0.00620675	0.00257618	0.0035289	0.0451029	0.00235555
12	0.00613281	0.00775439	0.00301896	0.00335906	0.0770558	0.00230936
13	0.00825694	0.00899412	0.00269694	0.00398181	0.0705998	0.00230936
14	0.0111317	0.0119678	0.00382402	0.00526505	0.0975544	0.00235555
15	0.0139266	0.0131509	0.00644045	0.00909588	0.0756873	0.00249411
16	0.0184943	0.0166351	0.00595741	0.0117378	0.0901166	0.00258649
17	0.0234612	0.0196331	0.0117538	0.0151913	0.171219	0.00300217
18	0.0289392	0.0284084	0.00974117	0.0235889	0.103029	0.00304836
19	0.0396237	0.0304909	0.0138067	0.0291182	0.12323	0.00387973
20	0.0480084	0.0356199	0.0166244	0.0370252	0.118232	0.0050806
21	0.0618871	0.0473933	0.0245542	0.0478006	0.254641	0.00720521
22	0.0755582	0.0546859	0.0299481	0.0664641	0.232387	0.00775946
23	0.0966876	0.0687118	0.03981	0.0706535	0.229918	0.0137176
24	0.121283	0.0777708	0.0553476	0.0856372	0.254046	0.0205533
25	0.145303	0.0942438	0.0774464	0.099281	0.344609	0.0257263
26	0.183505	0.115027	0.10035	0.129814	0.284273	0.0289132
27	0.204826	0.133761	0.127803	0.144251	0.365494	0.0402753
28	0.242134	0.153013	0.161333	0.181087	0.562954	0.0489585
29	0.277558	0.176544	0.202431	0.194656	0.43065	0.071544
30	0.332066	0.198859	0.240671	0.228699	0.573396	0.112974
31	0.370061	0.229366	0.272954	0.261139	0.574081	0.12235
32	0.407704	0.255125	0.330234	0.286256	0.578752	0.131079
33	0.467611	0.294164	0.378577	0.322828	0.745508	0.150293
34	0.493117	0.326187	0.414322	0.367817	0.625878	0.204609
35	0.547513	0.347894	0.454373	0.397973	0.647775	0.211769
36	0.580445	0.372916	0.501509	0.442339	0.778383	0.397303
37	0.608091	0.399622	0.521314	0.523787	0.69978	0.290056
38	0.631871	0.428849	0.540474	0.511653	0.778621	0.354256
39	0.671639	0.457347	0.578191	0.578551	0.760889	0.584546
40	0.706487	0.482814	0.629352	0.624125	0.86484	0.451065
41	0.699173	0.49398	0.619329	0.625729	0.86481	0.485012
42	0.751062	0.543553	0.678662	0.657848	0.771272	0.542792
43	0.745728	0.554143	0.700157	0.697269	0.825568	0.627038
44	0.771904	0.583443	0.707443	0.731483	0.850232	0.625883
45	0.786517	0.619362	0.710381	0.738257	0.869243	0.609579
46	0.812486	0.656327	0.715332	0.785945	0.897061	0.671701
47	0.804612	0.669648	0.773538	0.780114	0.917529	0.678675
48	0.840946	0.702627	0.759168	0.809458	0.866982	0.730775
49	0.837129	0.735297	0.79294	0.836727	0.913067	0.74888
50	0.88913	0.751292	0.807109	0.837161	0.860675	0.783982
51	0.877312	0.787099	0.807109	0.859391	0.921695	0.807492
52	0.903248	0.809276	0.84402	0.867883	0.891616	0.803704
53	0.897339	0.826786	0.852031	0.874771	0.997679	0.805598
54	0.918581	0.844799	0.880489	0.900606	0.985928	0.834234
55	0.906906	0.827767	0.857425	0.918854	0.975009	0.832202
56	0.935414	0.848291	0.888822	0.916137	1	0.843749
57	0.947584	0.880654	0.883307	0.946104	0.977865	0.844534
58	0.960999	0.905716	0.917925	0.940631	0.913721	0.857328
59	0.966813	0.944909	0.930805	0.961371	0.917916	0.868089
60	0.981729	0.951059	0.92674	0.953917	0.919136	0.894
61	0.970534	0.929951	0.961317	0.986696	0.901404	0.909196
62	1	0.959291	0.963813	0.99934	0.917589	0.909381
63	0.995161	0.981129	0.983174	0.968561	0.994675	0.955937
64	0.992957	1	0.949966	0.982865	0.919612	0.96111
65	0.995448	0.951918	1	1	0.968345	1
Fig. S2B
Lag phase (hrs)
aSyn	aSyn + CsgA:SlowGo
21.3139	16.4864
23.0493	28.7314
24.038	24.2219
Fig. S2C
Time to half-max (hrs)
aSyn	aSyn + CsgA:SlowGo
32.7	35.99
39.63	27.79
34.78	38.38
Fig. S2D
Beam crossing (sec), SlowGo colonized
WT	CsgA:SlowGo
5.54	4.51
7.55	3.04
4.56	3.81
9.39	4.53
3.89	5.6
14.03	4.45
4.05	4.68
6.33	4.37
6.07	3.35
4.72	4.29
Fig. S2E
Pole descent (sec), SlowGo colonized
WT	CsgA:SlowGo
9.18	5.51
6.42	4.93
10.79	4.94
9.39	10.53
4.27	5.77
5.37	7.6
8.19	7.31
4.1	3.16
3.92	3.33
6.7	4.55
Fig. S2F
Adhesive removal (sec), SlowGo colonized
WT	CsgA:SlowGo
39.405	1.68
9.405	0.99
3.92	3.21
6.25	1.15
6.03	6.03
11.72	6.06
5.26	1.47
27.63	1.98
6.53	4.17
4.93	12.39
Fig. S2G
Hindlimb Score, SlowGo colonized
WT	CsgA:SlowGo
0	0.5
0.5	1.5
1	1
1.5	0
1.5	1.5
1.5	1
2	0.5
1.5	1.5
1.5	0.5
1	0.5
Fig. S2H
Wirehang (sec), SlowGo colonized
WT	CsgA:SlowGo
8.955	11.275
8.2	12.17
8.61	13.56
2.39	11.76
3.08	10.02
10.03	3.755
5.63	7.325
7.68	20.39
16.59	9.115
16.25	14.66

## Sheet: Fig 3 fig supp 2 Statistics
Fig. S2D
Mann Whitney test
P value	0.0147
Exact or approximate P value?	Exact
P value summary	*
Significantly different (P < 0.05)?	Yes
One- or two-tailed P value?	Two-tailed
Sum of ranks in column B,D	137 , 73
Mann-Whitney U	18
Fig. S2E
Mann Whitney test
P value	0.393
Exact or approximate P value?	Exact
P value summary	ns
Significantly different (P < 0.05)?	No
One- or two-tailed P value?	Two-tailed
Sum of ranks in column A,B	117 , 93
Mann-Whitney U	38
Fig. S2F
Mann Whitney test
P value	0.0095
Exact or approximate P value?	Exact
P value summary	**
Significantly different (P < 0.05)?	Yes
One- or two-tailed P value?	Two-tailed
Sum of ranks in column A,B	138.5 , 71.50
Mann-Whitney U	16.5
Fig. S2G
Mann Whitney test
P value	0.1687
Exact or approximate P value?	Exact
P value summary	ns
Significantly different (P < 0.05)?	No
One- or two-tailed P value?	Two-tailed
Sum of ranks in column A,B	123 , 87
Mann-Whitney U	32
Fig. S2H
Mann Whitney test
P value	0.1655
Exact or approximate P value?	Exact
P value summary	ns
Significantly different (P < 0.05)?	No
One- or two-tailed P value?	Two-tailed
Sum of ranks in column A,B	86 , 124
Mann-Whitney U	31
