# Supplementary material for: A gut bacterial amyloid promotes α-synuclein aggregation and motor impairment in mice
Source: eLife. 2020 Feb 11;9:e53111. doi: 10.7554/eLife.53111 (PMC7012599; doi:10.7554/eLife.53111)
Supplement: Figure 3—figure supplement 3—source data 1. [file elife-53111-fig3-figsupp3-data1.xlsx]

## Sheet: Fig 3, fig supp 3
Fig. S3A
CsgA and N122A intestinal injected ASO mice
Beam crossing (sec)
Day	CsgA
0	4.47	5.46	2.69	2.02	2.95	6.73	12.89	10.65
7	7.34	4.26	7.07	2.41	2.79	10.14	13.49	9.83
21	7.59	3.27	4.67	2.99	5.91	11.19	5.89	8.58
70	8.85	4.14	4.74	3.09	10.13	16.17	12.3	58.58
Day	N122A
0	3.86	3.39	3.67	5.34	11.59	1.78	2.58	4.54
7	4.34	PUP	8.64	9.53	6.49	2.3	2.68	4.55
21	3.92	4.67	4.62	8.86	5.74	3.59	2.45	5.34
70	4.77	7.86	3.07	3.57	8.07	4	5.81	6.35
Fig. S3B
CsgA and N122A intestinal injected ASO mice
Pole descent (sec)
Day	CsgA
0	6.12	6.04	17.58	8.67	4.19	4.33	6.55	3.05
7	5.32	6.12	4.37	6.85	4.05	18.15	5.85	5.77
21	5.63	3.52	4.95	4.48	5.3	8.19	7.08	5.28
70	10.93	6.53	5.35	4.81	3.73	7.08	6.38	11.98
Day	N122A
0	14.65	9.98	8	7.95	4.56	2.48	5.67	6.19
7	4.34	5.22	5.25	4.36	4.24	3.59	2.91	2.97
21	4.96	4.25	4.19	4.98	2.77	3.68	2.52	3.13
70	7.06	3.5	4.55	4.02	4.31	2.42	3.05	3.34
Fig. S3C
CsgA and N122A intestinal injected ASO mice
Adhesive removal (sec)
Day	CsgA
0	1.59	1.88	1.67	1.28	1.97	7.62	1.38	3.74
7	0.82	4.59	19.05	1.9	4.24	4.19	1.98	9.23
21	3.88	9.81	38.04	6.03	2.84	3.76	3.08	28.58
70	28.6	32.12	29.03	10.56	4.3	5.37	4.61	84.04
Day	N122A
0	3.17	2.14	2.03	2.13	1.32	3.09	2.25	0.86
7	8.62	2.09	2.27	2.41	1.34	1.51	2.69	1.5
21	2.07	5.88	1.61	3.11	3.68	0.98	1.73	0.96
70	8.67	7.65	2.81	5.29	7.57	1	1.41	0.98
Fig. S3D
CsgA and N122A intestinal injected ASO mice
Hindlimb score
Day	CsgA
0	1	0	0	1	0	1	0	0
7	1	2	1	1	2	1	2	2
21	1	2	1	1	2	2	2	2
70	1	2	1	2	2	2	2	3
Day	N122A
0	0	1	0	1	1	0	0	1
7	0	2	1	0	0	1	0	0
21	0	1	0	0	0	1	0	1
70	1	2	1	0	0	1	1	1
Fig. S3E
CsgA and N122A intestinal injected ASO mice
Wirehang (sec)
Day	CsgA
0	16.63	14.94	7.69	14.62	21.75	13.38	26.18	14
7	8.76	23.57	4.09	12.89	18.89	12.93	6.84	8.55
21	9.77	9.01	2.03	8.45	14.15	33.53	12.49	13.23
70	8.34	1.19	5.05	5.66	9.78	13.54	8.72	4.52
Day	N122A
0	25.04	20.95	4.12	35.09	2.99	16.84	56.44	30.17
7	18.49	15.14	4.45	28.42	4.58	32.54	8.5	16.19
21	8.74	15.07	1.85	11.51	14.45	23.89	5.47	34.34
70	6.45	4.52	2.59	12.59	PUP	22.99	5.64	19.83
Fig. S3F
CsgA and N122A intestinal injected ASO mice
Principle Component analysis from ClustVis
CsgA day 0			CsgA day 70			N122A day 0			N122A day 0
PC2	PC1		PC2	PC1		PC2	PC1		PC2	PC1
0.134694	-0.439028		-0.94905	1.24578		-2.56268	-0.790743		0.246446	0.157228
-0.217234	-0.927551		0.79384	1.66909		-0.902763	-0.393063		1.5162	0.750231
-2.53427	-0.281331		0.514342	0.830315		-0.223652	-0.622023		1.0471	-0.173836
-0.330478	-0.396067		1.219	0.629671		-1.01351	-0.778543		0.334253	-0.951835
-0.0195561	-1.34516		1.25682	0.624431		0.9133	0.232622		0.102008	-0.661712
0.582657	-0.104803		0.244713	1.06903		0.568016	-1.32564		0.749738	-0.854555
-0.875195	-0.815202		0.655946	0.923522		-1.69179	-2.22256		1.24317	-0.234545
0.40909	-0.707359		-1.43996	7.31167		-0.396469	-0.826864		0.625267	-0.591186
Fig. S3G
CsgA and N122A intestinal injected ASO mice
Fecal output per mouse
Time (min)	CsgA
0	0	0	0	0	0	0	0	0
5	0	0	0	0	0	2	1	3
10	0	4	2	0	0	2	1	4
15	0	4	2	3	0	7	1	5
Time (min)	N122A
0	0	0	0	0	0	0	0	0
5	3	6	0	5	0	8	2	5
10	8	9	7	7	1	11	3	7
15	10	10	8	7	5	11	5	8
Fig. S3H
Striatum synuclein fibril density				Midbrain synuclein fibril density
ASO mice				ASO mice
WT	ΔcsgBAC			WT	ΔcsgBAC
2.508	3.065			2.93	1.909
2.613	2.847			2.157	1.603
2.861	3.084			2.951	1.684
2.021	3.076			3.057	1.213

## Sheet: Fig 3, fig supp 3 Statistics
Fig. S3A
Source of Variation	% of total variation	P value	P value summary	Significant?		ANOVA table	SS (Type III)	DF	MS	F (DFn, DFd)	P value
Interaction	5.449	0.3115	ns	No		Interaction	183.8	3	61.28	F (3, 55) = 1.219	P = 0.3115
Row Factor (Age)	7.029	0.2065	ns	No		Row Factor (Age)	237.1	3	79.04	F (3, 55) = 1.572	P = 0.2065
Column Factor (Treatment)	5.486	0.0602	ns	No		Column Factor (Treatment)	185.1	1	185.1	F (1, 55) = 3.682	P = 0.0602
						Residual	2765	55	50.27
Sidak's multiple comparisons test	Predicted (LS) mean diff.	95.00% CI of diff.	Significant?	Summary	Adjusted P Value
CsgA vs N122A
0 day	1.389	-7.740 to 10.52	No	ns	0.9915
7 day	1.662	-7.788 to 11.11	No	ns	0.9854
21 day	1.363	-7.767 to 10.49	No	ns	0.9921
70 day	9.313	0.1834 to 18.44	Yes	*	0.0438
Fig. S3B
Source of Variation	% of total variation	P value	P value summary	Significant?		ANOVA table	SS	DF	MS	F (DFn, DFd)	P value
Interaction	4.839	0.3324	ns	No		Interaction	30.51	3	10.17	F (3, 56) = 1.162	P = 0.3324
Row Factor (Age)	8.763	0.11	ns	No		Row Factor (Age)	55.24	3	18.41	F (3, 56) = 2.104	P = 0.1100
Column Factor (Treatment)	8.669	0.0154	*	Yes		Column Factor (Treatment)	54.65	1	54.65	F (1, 56) = 6.245	P = 0.0154
						Residual	490	56	8.75
Sidak's multiple comparisons test	Mean Diff.	95.00% CI of diff.	Significant?	Summary	Adjusted P Value
CsgA vs N122A
0 day	-0.3687	-4.175 to 3.438	No	ns	0.9985
7 day	2.95	-0.8564 to 6.756	No	ns	0.1888
21 day	1.744	-2.063 to 5.550	No	ns	0.6723
70 day	3.068	-0.7389 to 6.874	No	ns	0.1601
Fig. S3C
Source of Variation	% of total variation	P value	P value summary	Significant?		ANOVA table	SS	DF	MS	F (DFn, DFd)	P value
Interaction	9.334	0.0584	ns	No		Interaction	948.9	3	316.3	F (3, 56) = 2.638	P = 0.0584
Row Factor (Age)	13.67	0.0139	*	Yes		Row Factor (Age)	1390	3	463.4	F (3, 56) = 3.865	P = 0.0139
Column Factor (Treatment)	10.95	0.0035	**	Yes		Column Factor (Treatment)	1114	1	1114	F (1, 56) = 9.289	P = 0.0035
						Residual	6714	56	119.9
Sidak's multiple comparisons test	Mean Diff.	95.00% CI of diff.	Significant?	Summary	Adjusted P Value
CsgA vs N122A
0 day	0.5175	-13.57 to 14.61	No	ns	> 0.9999
7 day	2.946	-11.14 to 17.04	No	ns	0.9725
21 day	9.5	-4.589 to 23.59	No	ns	0.3088
70 day	20.41	6.317 to 34.50	Yes	**	0.0018
Fig. S3D
Source of Variation	% of total variation	P value	P value summary	Significant?		ANOVA table	SS	DF	MS	F (DFn, DFd)	P value
Interaction	11.13	0.0077	**	Yes		Interaction	4.547	3	1.516	F (3, 56) = 4.381	P=0.0077
Row Factor (Age)	17.55	0.0005	***	Yes		Row Factor (Age)	7.172	3	2.391	F (3, 56) = 6.910	P=0.0005
Column Factor (Treatment)	23.9	<0.0001	****	Yes		Column Factor (Treatment)	9.766	1	9.766	F (1, 56) = 28.23	P<0.0001
						Residual	19.38	56	0.346
Sidak's multiple comparisons test
CsgA vs N122A	Mean Diff.	95.00% CI of diff.	Significant?	Summary	Adjusted P Value
0 day	-0.125	-0.8819 to 0.6319	No	ns	0.9885
7 day	1	0.2431 to 1.757	Yes	**	0.005
21 day	1.25	0.4931 to 2.007	Yes	***	0.0003
70 day	1	0.2431 to 1.757	Yes	**	0.005
Fig. S3E
Source of Variation	% of total variation	P value	P value summary	Significant?		ANOVA table	SS (Type III)	DF	MS	F (DFn, DFd)	P value
Interaction	1.232	0.8362	ns	No		Interaction	81.14	3	27.05	F (3, 55) = 0.2848	P = 0.8362
Row Factor (Age)	14.83	0.0232	*	Yes		Row Factor	976.2	3	325.4	F (3, 55) = 3.427	P = 0.0232
Column Factor (Treatment)	4.272	0.0909	ns	No		Column Factor	281.3	1	281.3	F (1, 55) = 2.962	P = 0.0909
						Residual	5223	55	94.97
Sidak's multiple comparisons test
CsgA vs N122A	Predicted (LS) mean diff.	95.00% CI of diff.	Significant?	Summary	Adjusted P Value
0 day	-7.806	-20.35 to 4.741	No	ns	0.3862
7 day	-3.974	-16.52 to 8.574	No	ns	0.8855
21 day	-1.583	-14.13 to 10.96	No	ns	0.9959
70 day	-3.559	-16.55 to 9.429	No	ns	0.9288
Fig. S3G
Source of Variation	% of total variation	P value	P value summary	Significant?		ANOVA table	SS	DF	MS	F (DFn, DFd)	P value
Interaction	9.516	0.0021	**	Yes		Interaction	71.05	3	23.68	F (3, 56) = 5.558	P=0.0021
Row Factor (Time)	35.45	<0.0001	****	Yes		Row Factor	264.7	3	88.22	F (3, 56) = 20.70	P<0.0001
Column Factor (Treatment)	23.07	<0.0001	****	Yes		Column Factor	172.3	1	172.3	F (1, 56) = 40.43	P<0.0001
						Residual	238.6	56	4.261
Sidak's multiple comparisons test	Mean Diff.	95.00% CI of diff.	Significant?	Summary	Adjusted P Value
CsgA vs N122A
0 min	0	-2.656 to 2.656	No	ns	>0.9999
5 min	-2.875	-5.531 to -0.2188	Yes	*	0.0288
10 min	-5	-7.656 to -2.344	Yes	****	<0.0001
15 min	-5.25	-7.906 to -2.594	Yes	****	<0.0001
Fig. S3H
Midbrain synuclein fibril density
Mann Whitney test
P value	0.0286
Exact or approximate P value?	Exact
P value summary	*
Significantly different (P < 0.05)?	Yes
One- or two-tailed P value?	Two-tailed
Sum of ranks in column B,D	26 , 10
Mann-Whitney U	0
