# Supplementary material for: A gut bacterial amyloid promotes α-synuclein aggregation and motor impairment in mice
Source: eLife. 2020 Feb 11;9:e53111. doi: 10.7554/eLife.53111 (PMC7012599; doi:10.7554/eLife.53111)
Supplement: Figure 3—source data 1. [file elife-53111-fig3-data1.xlsx]

## Sheet: Figure 3
Fig. 3A
Normalized Thioflavin T fluorescence
Time (hrs)	αSyn			αSyn:CsgA
0	0.00133749	0.00108757	0.000382502	0.0017638	0.000263131	0.00137712
1	0.00138526	0.00101959	8.05266e-05	0.00231978	-0.00208481	0.00230703
2	0.00144895	0.00163135	0.000161053	0.00320169	-0.017731	0.00247739
3	0.00140118	0.00101959	6.0395e-05	0.00444785	-0.0141484	0.00402487
4	0.00135342	0.0017503	0.000100658	0.0053681	-0.00145734	0.00393259
5	0.00138526	0.00120652	0.000301975	0.00398773	-0.00135614	0.00350668
6	0.00173556	0.000764695	0.00024158	0.00621166	-0.0188442	0.00503287
7	0.00238838	0.000764695	0.000301975	0.00738113	-0.0152009	0.00818462
8	0.00302528	0.00168233	0.000563687	0.00979678	0.00329926	0.0158085
9	0.00377364	0.00137645	0.00128843	0.0154716	0.0321223	0.0316382
10	0.00447424	0.00127449	0.00209369	0.0326112	0.0826839	0.0584707
11	0.00533405	0.00271892	0.00380488	0.05324	0.149054	0.0993938
12	0.00611426	0.00392543	0.00644213	0.0845092	0.206538	0.146954
13	0.00823196	0.00407837	0.00962293	0.124271	0.289363	0.214575
14	0.011098	0.00810577	0.0161053	0.173946	0.338367	0.285518
15	0.0138845	0.00805479	0.0217623	0.228259	0.394636	0.351555
16	0.0184383	0.0126769	0.0326536	0.277665	0.458152	0.429618
17	0.0233902	0.017435	0.0444306	0.342408	0.494282	0.488188
18	0.0288517	0.0206977	0.0612405	0.397929	0.540937	0.544252
19	0.0395039	0.0289564	0.0832444	0.446894	0.605161	0.605392
20	0.0478632	0.03764	0.102833	0.504007	0.598664	0.661989
21	0.0616999	0.0460686	0.124172	0.545801	0.64119	0.679984
22	0.0753296	0.0593573	0.152799	0.586676	0.691307	0.710997
23	0.0963951	0.070284	0.177239	0.617331	0.691226	0.75745
24	0.120916	0.0883477	0.207276	0.672067	0.736788	0.78101
25	0.144863	0.108213	0.235158	0.699463	0.751037	0.820911
26	0.18295	0.1405	0.27373	0.72431	0.728975	0.863914
27	0.204207	0.170595	0.320939	0.754908	0.745026	0.868436
28	0.241402	0.210155	0.37316	0.784797	0.817225	0.890619
29	0.276718	0.278281	0.407143	0.805023	0.812549	0.903815
30	0.331062	0.335038	0.419926	0.788171	0.84198	0.897305
31	0.368941	0.405356	0.432448	0.824981	0.85042	0.925345
32	0.406471	0.401193	0.463008	0.84931	0.842587	0.908592
33	0.466196	0.554115	0.487448	0.848888	0.862848	0.923975
34	0.491625	0.616191	0.507439	0.844287	0.889687	0.951737
35	0.545857	0.66802	0.531637	0.868673	0.883979	0.947769
36	0.578689	0.659269	0.584946	0.89329	0.867524	0.950566
37	0.606251	0.756946	0.583939	0.864647	0.882603	0.96049
38	0.62996	0.690316	0.61309	0.883589	0.867483	0.949742
39	0.669607	0.817731	0.622411	0.892485	0.880194	0.953938
40	0.70435	0.832379	0.703461	0.914705	0.869042	0.971627
41	0.697058	0.824698	0.692972	0.9088	0.91681	0.953455
42	0.74879	0.878821	0.700823	0.902933	0.927943	0.983822
43	0.743472	0.88606	0.786363	0.91388	0.912559	0.977902
44	0.769569	0.873774	0.779699	0.930291	0.920413	0.982332
45	0.784138	0.919469	0.858253	0.942293	0.930594	0.971606
46	0.810028	0.926419	0.797637	0.940491	0.954579	0.979634
47	0.802178	0.881761	0.827935	0.953336	0.94537	0.958033
48	0.838402	0.935647	0.844644	0.906269	0.9546	0.981998
49	0.834597	0.950176	0.902442	0.921472	0.963809	0.976809
50	0.88644	0.803609	0.908461	0.953067	0.950127	0.978044
51	0.874658	0.955512	0.914642	0.944191	0.942475	0.982325
52	0.900516	0.958503	0.893745	0.950192	0.956037	0.963769
53	0.894625	0.971808	0.911682	0.975556	0.955511	0.98669
54	0.915802	0.818529	0.909448	0.971875	0.97727	1
55	0.904162	0.83554	0.913877	0.98589	0.987775	0.991141
56	0.932584	0.98056	0.937813	0.978892	0.993219	0.982296
57	0.944717	0.990178	0.912206	0.962347	0.998097	0.980635
58	0.958092	0.982378	0.945383	0.961944	0.972918	0.991247
59	0.963888	0.987867	0.908018	0.947009	1	0.996245
60	0.978759	0.998063	0.953174	1	0.986358	0.98965
61	0.967598	0.991215	0.914722	0.988785	0.95375	0.956656
62	0.996975	1	0.954986	0.979505	0.974476	0.98757
63	0.99215	0.832107	0.957804	0.957822	0.962919	0.991702
64	0.989953	0.998386	1	0.970437	0.939885	0.992596
65	0.992437	0.995004	0.948382	0.974962	0.988787	0.986484
66	1	0.861182	0.971735	0.969709	0.945087	0.989132
Fig. 3B
Lag phase (hrs)
aSyn	aSyn + CsgA
24.6962	8.8438
17.3748	3.95821
21.3139	9.19667
Fig. 3C
Time to half-max (hrs)
aSyn	aSyn + CsgA
33.24	20.99
31.68	17.12
32.92	16.53

## Sheet: Figure 3 Statistics
Fig. 3B
Unpaired t test
P value	0.008
P value summary	**
Significantly different (P < 0.05)?	Yes
One- or two-tailed P value?	Two-tailed
t, df	t=4.909, df=4
Fig. 3C
Unpaired t test
P value	0.0006
P value summary	***
Significantly different (P < 0.05)?	Yes
One- or two-tailed P value?	Two-tailed
t, df	t=9.747, df=4
