# Supplementary material for: A gut bacterial amyloid promotes α-synuclein aggregation and motor impairment in mice
Source: eLife. 2020 Feb 11;9:e53111. doi: 10.7554/eLife.53111 (PMC7012599; doi:10.7554/eLife.53111)
Supplement: Figure 4—figure supplement 1—source data 1. [file elife-53111-fig4-figsupp1-data1.xlsx]

## Sheet: Fig 4, fig supp 1
Fig. S1A
OD600 E. coli growth in EGCG broth
Time (hrs)	Vehicle				+EGCG (30μg/mL)				+EGCG (60μg/mL)				+EGCG (120μg/mL)
1	0.119	0.094	0.079	0.081	0.053	0.059	0.024	0.066	0.056	0.058	0.013	0.095	0.03	0.033	0.059	0.051
2	0.361	0.323	0.337	0.332	0.328	0.363	0.2	0.419	0.306	0.342	0.165	0.354	0.246	0.272	0.167	0.297
3	1.011	1.024	1.02	0.881	0.722	0.713	0.541	0.841	0.723	0.716	0.504	0.721	0.576	0.607	0.421	0.64
4	1.199	1.218	1.203	1.074	1.115	1.073	0.934	1.135	1.095	1.116	0.88	1.121	0.994	1.045	0.82	1.05
5	1.315	1.279	1.277	1.196	1.222	1.211	1.13	1.238	1.212	1.219	1.121	1.225	1.208	1.251	1.074	1.237
6	1.373	1.322	1.311	1.25	1.299	1.277	1.212	1.303	1.288	1.283	1.212	1.305	1.288	1.316	1.185	1.313
7	1.387	1.355	1.34	1.293	1.35	1.317	1.262	1.352	1.342	1.333	1.272	1.342	1.302	1.339	1.245	1.317
8	1.423	1.386	1.375	1.332	1.388	1.361	1.309	1.383	1.38	1.37	1.323	1.37	1.334	1.357	1.278	1.325
9	1.473	1.412	1.392	1.369	1.446	1.413	1.374	1.42	1.425	1.406	1.407	1.408	1.363	1.371	1.313	1.33
10	1.499	1.422	1.403	1.382	1.453	1.413	1.377	1.424	1.438	1.412	1.398	1.418	1.377	1.377	1.329	1.337
11	1.512	1.437	1.422	1.405	1.467	1.424	1.392	1.436	1.45	1.423	1.403	1.426	1.402	1.393	1.346	1.348
12	1.524	1.455	1.438	1.438	1.481	1.453	1.412	1.455	1.468	1.443	1.418	1.442	1.425	1.408	1.376	1.36
Fig. S1B
OD595 Crystal Violet biofilm assay
EGCG (ug/mL)	0	32	64	125	250	500
	0.284	0.83	0.513	0.298	0.432	0
	0.355	0.854	0.447	0.27	0.345	0
	0.276	0.93	0.504	0.351	0.581	0.02
	0.855	1.058	0.81	0.478	0.284	0.508
	0.942	0.699	0.583	0.487	0.471	0.144
	1.084	0.975	0.685	0.536	0.329	0.318
Fig. S1C
cfu / g feces (EGCG treated, ASO mice)
Vehicle	EGCG
200000000	600000000
1666666666	4250000000
950000000	380952380
636363636	1250000000
	1111111111
Fig. S1D
Beam crossing (sec), EGCG treated, E. coli mono-colonized ASO mice
Age (wks)	Vehicle
10	8.89	2.86	4.99	6.3	7.02	3.52	3.45	6.44	9.16	18.62	3.92	PUP
12	6.08	4.37	8.32	6.73	6.27	6.96	11.31	15.55	4.87	6.69	4.05	(deceased)
15	7.43	3.88	3.89	6.96	4.23	8.54	7.59	11.55	8.83	14.57	9.45	(deceased)
Age (wks)	EGCG
10	8.94	3.23	2.92	1.99	4.32	6.17	1.7	2.98	3.28	3.46
12	10.51	2.25	5.76	3.67	7.87	4.38	0.99	4.29	6.59	4.92
15	6.53	2.74	2.54	4.1	7.14	4.51	3.35	4.4	6.88	3.69
Fig. S1E
Pole descent (sec), EGCG treated, E. coli mono-colonized ASO mice
Age (wks)	Vehicle
10	4.42	5.43	5.06	4.85	4.25	4.26	3.71	5.68	6.11	9.87	7.39	PUP
12	7.72	6.21	9.2	7.77	6.35	5.31	3.84	5.67	6.23	5.77	5.86	(deceased)
15	6.6	7.99	6.2	7.11	7.82	6.14	3.16	6.89	6.48	6.82	7.09	(deceased)
Age (wks)	EGCG
10	4.25	3.88	3.84	3.57	4.1	7.53	5.35	3.96	3.69	2.95
12	6.17	4.59	3.95	5.35	6.46	4.46	2.86	3.41	4.72	3.53
15	4.21	2.34	2.82	4.67	3.66	4.42	3.71	2.81	3.17	3.21
Fig. S1F
Adhesive removal (sec), EGCG treated, E. coli mono-colonized ASO mice
Age (wks)	Vehicle
10	3.62	2.39	0.99	6.77	10.34	9.74	1.49	2.82	5.85	26.98	9.62	PUP
12	3.68	4.25	3.22	4.56	5.64	11.12	1.81	3.06	4.68	48.9	3.96	(deceased)
15	3.67	5.22	11.31	6.28	17.79	11.98	4.11	2.44	24.72	42.33	7.97	(deceased)
Age (wks)	EGCG
10	1.48	2.29	0.61	1.59	1.56	2.69	1.34	1.42	3.19	2.16
12	1.72	1.89	0.78	2.56	2.71	1.81	1.79	1.62	7.21	2.58
15	PUP	3.52	1.11	2.6	34.55	0.98	1.61	1.48	0.68	0.94
Fig. S1G
Hindlimb score, EGCG treated, E. coli mono-colonized ASO mice
Age (wks)	Vehicle
10	2	1	1	0	1	2	1	0	1	0	1	2
12	2	1	0	0	2	1	2	1	2	1	2	(deceased)
15	2	1	0	0	2	1	2	1	2	0	2	(deceased)
Age (wks)	EGCG
10	3	1	0	1	0	1	0	0	1	2
12	2	1	0	1	0	0	0	0	1	2
15	2	1	0	1	0	0	1	1	0	1
Fig. S1H
Wirehang (sec), EGCG treated, E. coli mono-colonized ASO mice
Age (wks)	Vehicle
10	2.86	1.98	6.43	3.36	13.26	9.35	10.62	40.46	7.96	8.89	13.12	12.415
12	5.69	8.08	2.06	5.57	23.42	10.24	16.78	60	17.09	6.88	11.62	(deceased)
15	4.33	1.44	8.59	12.33	17.77	10.22	14.93	18.75	13.49	12.03	14.64	(deceased)
Age (wks)	EGCG
10	26.96	11.65	41.39	11.99	38.93	5.45	34.39	5.11	14.87	7.68
12	31.16	13.89	34.61	11.22	49.46	4.55	23.32	6.4	39.56	9.74
15	26.31	15.45	39.48	20.49	37.64	11.99	17.79	5.34	39.11	6.25
Fig. S1I
Principle Coordinate Analysis, PC1 and PC2 from ClustVis
10wks					15wks
Vehicle		EGCG			Vehicle		EGCG
PC2	PC1	PC2	PC1		PC2	PC1	PC2	PC1
-1.60315	0.522339	-1.29758	-0.119299		-1.48593	0.964629	-0.501897	-0.494721
-1.00455	-0.272493	-0.560842	-0.956902		-0.799088	0.900651	-0.485984	-1.69405
-0.710972	-0.232593	1.8644	-1.92731		0.50989	0.379525	1.7305	-2.16256
0.200652	0.199837	-0.632493	-1.30692		0.810828	0.804599	0.584743	1.02365
-0.121545	0.185916	1.83503	-1.5039		-0.613263	1.31063	1.87292	-1.19289
-1.42219	-0.214455	-0.547012	0.880659		-0.0787474	1.21397	0.448065	-0.720727
-0.627785	-0.997865	1.52822	-1.42239		-1.08955	-0.361692	-0.256235	-1.186
2.12346	-0.612529	-0.0154924	-0.966607		0.378808	1.21163	-0.918614	-1.05423
-0.281964	1.01635	-0.382147	-1.03624		-0.551611	2.10438	1.9111	-1.43243
1.7303	4.82529	-1.72085	-1.03502		1.82323	3.95156	-0.7696	-0.7143
-0.133029	0.676754				-0.740014	1.44576
Fig. S1J
Striatum synuclein fibril density
Vehicle	EGCG
1.07994	0.279404
1.91686	0.1763
0.791374	0.335613
1.555	0.285333
Fig. S1L
pS129-aSyn+ cells per frame SN
Vehicle	EGCG
37	2
18	2
25	17
38
Fig. S1M
pS129-aSyn+ cells per frame SN (TH+ region)
Vehicle	EGCG
4	1
1	0
10	2
8
Fig. S1N
TH+ cells per frame SN, ASO mice
Vehicle	EGCG
151	167
76	175
116	155
155
Fig. S1P
EGCG treated ASO mice, SN
Iba+ cell diameter (um)			Iba+ cell branch length (um)			Iba+ cell branch points
Vehicle	EGCG		Vehicle	EGCG		Vehicle	EGCG
5.48	4.76		723.4	1277.6		49.8	96.1
6.59	4.45		824.9	1301.8		61.8	95.8
5.43	4.42		668.2	1166.5		42.8	77
Fig. S1R
Striatum
Iba+ cell diameter (um)			Iba+ cell branch length (um)			Iba+ cell branch points
Vehicle	EGCG		Vehicle	EGCG		Vehicle	EGCG
5.83	5.41		964.7	1122.5		70.4	72.5
5.8	4.54		394.1	1457.7		26.7	101.3
5.52	4.68		864	1461.8		54	101.7

## Sheet: Fig 4, fig supp 1 Statistics
Fig. S1A
ANOVA summary			ANOVA table	SS	DF	MS	F (DFn, DFd)	P value
F	9.513		Treatment (between columns)	1.94	5	0.3881	F (5, 31) = 9.513	P<0.0001
P value	<0.0001		Residual (within columns)	1.265	31	0.0408
P value summary	****		Total	3.205	36
Significant diff. among means (P < 0.05)?	Yes
R square	0.6054
Tukey's multiple comparisons test	Mean Diff.	95.00% CI of diff.	Significant?	Summary	Adjusted P Value
Column A vs. Column B	-0.2143	-0.5554 to 0.1268	No	ns	0.4171	A-B
Column A vs. Column C	0.08638	-0.2547 to 0.4274	No	ns	0.9708	A-C
Column A vs. Column D	0.2734	-0.06768 to 0.6144	No	ns	0.1763	A-D
Column A vs. Column E	0.2697	-0.07135 to 0.6108	No	ns	0.1873	A-E
Column A vs. Column F	0.5117	0.1706 to 0.8528	Yes	***	0.001	A-F
Column B vs. Column C	0.3007	-0.05327 to 0.6546	No	ns	0.1331	B-C
Column B vs. Column D	0.4877	0.1337 to 0.8416	Yes	**	0.0028	B-D
Column B vs. Column E	0.484	0.1301 to 0.8379	Yes	**	0.003	B-E
Column B vs. Column F	0.726	0.3721 to 1.080	Yes	****	<0.0001	B-F
Column C vs. Column D	0.187	-0.1669 to 0.5409	No	ns	0.6024	C-D
Column C vs. Column E	0.1833	-0.1706 to 0.5373	No	ns	0.6221	C-E
Column C vs. Column F	0.4253	0.07139 to 0.7793	Yes	*	0.0113	C-F
Column D vs. Column E	-0.003667	-0.3576 to 0.3503	No	ns	>0.9999	D-E
Column D vs. Column F	0.2383	-0.1156 to 0.5923	No	ns	0.342	D-F
Column E vs. Column F	0.242	-0.1119 to 0.5959	No	ns	0.3259	E-F
Fig. S1D
Two-Way ANOVA
Source of Variation	% of total variation	P value	P value summary	Significant?		ANOVA table	SS (Type III)	DF	MS	F (DFn, DFd)	P value
Interaction	0.4293	0.8583	ns	No		Interaction	2.992	2	1.496	F (2, 57) = 0.1532	P = 0.8583
Row Factor (Age)	1.56	0.5762	ns	No		Row Factor (Age)	10.88	2	5.438	F (2, 57) = 0.5567	P = 0.5762
Column Factor (Treatment)	18.13	0.0007	***	Yes		Column Factor (Treatment)	126.4	1	126.4	F (1, 57) = 12.94	P = 0.0007
						Residual	556.7	57	9.767
Sidak's multiple comparisons test	Predicted (LS) mean diff.	95.00% CI of diff.	Significant?	Summary	Adjusted P Value
Vehicle vs. EGCG
10wks	2.935	-0.4245 to 6.294	No	ns	0.1038
12wks	2.259	-1.100 to 5.618	No	ns	0.2797
15wks	3.314	-0.04529 to 6.673	No	ns	0.0542
Fig. S1E
Two-Way ANOVA
Source of Variation	% of total variation	P value	P value summary	Significant?		ANOVA table	SS (Type III)	DF	MS	F (DFn, DFd)	P value
Interaction	5.182	0.0816	ns	No		Interaction	9.233	2	4.617	F (2, 57) = 2.620	P = 0.0816
Row Factor (Age)	1.799	0.4086	ns	No		Row Factor (Age)	3.205	2	1.602	F (2, 57) = 0.9093	P = 0.4086
Column Factor (Treatment)	36.63	< 0.0001	****	Yes		Column Factor (Treatment)	65.27	1	65.27	F (1, 57) = 37.04	P < 0.0001
						Residual	100.5	57	1.762
Sidak's multiple comparisons test	Predicted (LS) mean diff.	95.00% CI of diff.	Significant?	Summary	Adjusted P Value
Vehicle vs. EGCG
10wks	1.236	-0.1907 to 2.663	No	ns	0.1081
12wks	1.807	0.3804 to 3.234	Yes	**	0.0086
15wks	3.071	1.644 to 4.498	Yes	****	< 0.0001
Fig. S1F
Two-Way ANOVA
Source of Variation	% of total variation	P value	P value summary	Significant?		ANOVA table	SS (Type III)	DF	MS	F (DFn, DFd)	P value
Interaction	0.1412	0.9546	ns	No		Interaction	8.006	2	4.003	F (2, 56) = 0.04653	P = 0.9546
Row Factor (Age)	3.667	0.3064	ns	No		Row Factor (Age)	207.9	2	103.9	F (2, 56) = 1.208	P = 0.3064
Column Factor (Treatment)	10.8	0.01	**	Yes		Column Factor (Treatment)	612.4	1	612.4	F (1, 56) = 7.119	P = 0.0100
						Residual	4817	56	86.02
Sidak's multiple comparisons test	Predicted (LS) mean diff.	95.00% CI of diff.	Significant?	Summary	Adjusted P Value
Vehicle vs. EGCG
10wks	5.495	-4.479 to 15.47	No	ns	0.4497
12wks	6.158	-3.816 to 16.13	No	ns	0.351
15wks	7.255	-3.006 to 17.51	No	ns	0.2397
Fig. S1G
Two-Way ANOVA
Source of Variation	% of total variation	P value	P value summary	Significant?		ANOVA table	SS (Type III)	DF	MS	F (DFn, DFd)	P value
Interaction	1.613	0.6067	ns	No		Interaction	0.6765	2	0.3382	F (2, 58) = 0.5041	P=0.6067
Row Factor (Age)	0.05797	0.9821	ns	No		Row Factor (Age)	0.02431	2	0.01216	F (2, 58) = 0.01812	P=0.9821
Column Factor (Treatment)	5.624	0.0659	ns	No		Column Factor (Treatment)	2.359	1	2.359	F (1, 58) = 3.515	P=0.0659
						Residual	38.92	58	0.671
Sidak's multiple comparisons test	Predicted (LS) mean diff.	95.00% CI of diff.	Significant?	Summary	Adjusted P Value
Vehicle vs. EGCG
10wks	0.1	-0.7623 to 0.9623	No	ns	0.9888
12wks	0.5727	-0.3073 to 1.453	No	ns	0.3068
15wks	0.4818	-0.3982 to 1.362	No	ns	0.4556
Fig. S1H
Two-Way ANOVA
Source of Variation	% of total variation	P value	P value summary	Significant?		ANOVA table	SS (Type III)	DF	MS	F (DFn, DFd)	P value
Interaction	0.2359	0.9246	ns	No		Interaction	25.84	2	12.92	F (2, 58) = 0.07848	P = 0.9246
Row Factor (Age)	1.16	0.6816	ns	No		Row Factor (Age)	127.1	2	63.53	F (2, 58) = 0.3859	P = 0.6816
Column Factor (Treatment)	11.27	0.0082	**	Yes		Column Factor (Treatment)	1235	1	1235	F (1, 58) = 7.502	P = 0.0082
						Residual	9550	58	164.7
Sidak's multiple comparisons test	Predicted (LS) mean diff.	95.00% CI of diff.	Significant?	Summary	Adjusted P Value
Vehicle vs. EGCG
10wks	-8.95	-22.46 to 4.558	No	ns	0.292
12wks	-7.17	-20.95 to 6.614	No	ns	0.4995
15wks	-10.3	-24.09 to 3.483	No	ns	0.199
Fig. S1J
Mann Whitney test
P value	0.0286
Exact or approximate P value?	Exact
P value summary	*
Significantly different (P < 0.05)?	Yes
One- or two-tailed P value?	Two-tailed
Sum of ranks in column A,B	26 , 10
Mann-Whitney U	0
Fig. S1L
Unpaired t test
P value	0.0247
P value summary	*
Significantly different (P < 0.05)?	Yes
One- or two-tailed P value?	Two-tailed
t, df	t=3.173, df=5
Fig. S1P
Iba+ cell diameter (um)			Iba+ cell branch length (um)			Iba+ cell branch points
Unpaired t test			Unpaired t test			Unpaired t test
P value	0.0306		P value	0.0012		P value	0.0105
P value summary	*		P value summary	**		P value summary	*
Significantly different (P < 0.05)?	Yes		Significantly different (P < 0.05)?	Yes		Significantly different (P < 0.05)?	Yes
One- or two-tailed P value?	Two-tailed		One- or two-tailed P value?	Two-tailed		One- or two-tailed P value?	Two-tailed
t, df	t=3.275, df=4		t, df	t=8.226, df=4		t, df	t=4.540, df=4
Fig. S1R
Iba+ cell diameter (um)			Iba+ cell branch length (um)			Iba+ cell branch points
Unpaired t test			Unpaired t test			Unpaired t test
P value	0.043		P value	0.0439		P value	0.0605
P value summary	*		P value summary	*		P value summary	ns
Significantly different (P < 0.05)?	Yes		Significantly different (P < 0.05)?	Yes		Significantly different (P < 0.05)?	No
One- or two-tailed P value?	Two-tailed		One- or two-tailed P value?	Two-tailed		One- or two-tailed P value?	Two-tailed
t, df	t=2.925, df=4		t, df	t=2.906, df=4		t, df	t=2.592, df=4
