# Supplementary material for: A gut bacterial amyloid promotes α-synuclein aggregation and motor impairment in mice
Source: eLife. 2020 Feb 11;9:e53111. doi: 10.7554/eLife.53111 (PMC7012599; doi:10.7554/eLife.53111)
Supplement: Figure 4—source data 1. [file elife-53111-fig4-data1.xlsx]

## Sheet: Figure 4
Fig. 4A
Arbitrary fluorescence units, Thioflavin T
Time (hrs)	αSyn	αSyn+CsgA	αSyn+EGCG	αSyn+CsgA+EGCG
0	39	40	70.3333	54.3333
0.5	33.3333	42.6667	34.6667	49.3333
1	33	70.6667	33.6667	84
1.5	37	95	35.6667	73.3333
2	34.3333	116	34	71.6667
2.5	37	117	35.6667	72.6667
3	35.6667	118	34.6667	64
3.5	37	106.667	35	56.6667
4	34.6667	106.333	33.6667	56.3333
4.5	34.3333	99.6667	34	58.3333
5	34.3333	104.667	35	56
5.5	36	125	33.6667	55.3333
6	34.3333	181.333	34.3333	54
6.5	36	375.667	32	53.3333
7	36	774.667	34.6667	48
7.5	33	1508.67	32.6667	48
8	34.6667	2680	33.3333	49
8.5	36.3333	4156	33.6667	47.6667
9	33.3333	5953.33	32.3333	46.3333
9.5	35	7645	34.3333	46.6667
10	33.6667	9427.33	33.6667	49.3333
10.5	35	11022	34.6667	47
11	33.3333	12440.7	36.3333	43.6667
11.5	36	13857.7	37.3333	48
12	36.6667	15054.7	39.6667	46.3333
12.5	41.3333	15758.3	41.6667	57
13	55.3333	16547.3	45	54.3333
13.5	79.3333	17451.7	43.6667	55.6667
14	127.333	18408.7	48	57.3333
14.5	245.667	19522.7	47.3333	59.6667
15	405.333	20010.3	50.6667	63.3333
15.5	691	20709.7	51.6667	65.3333
16	1070.33	21644.3	54	69
16.5	1600.33	21912	55.3333	71
17	2258.67	22807.7	58.3333	75.6667
17.5	2861	23165	62	80.3333
18	3836.33	23351	65	82.6667
18.5	4977.33	23956.3	69.6667	85
19	5996.33	23991.7	72	89.6667
19.5	7210.67	23953	74.6667	93.6667
20	8236.67	24404.3	79.6667	98
20.5	9333.67	24335.7	80.6667	103.667
21	10208	24477.3	85.3333	106.667
21.5	12055	24790	87.6667	114.667
22	12660.7	25280.7	90	120
22.5	13700.3	24785.7	93.6667	124
23	14849.7	25823.3	93.3333	130.667
23.5	16228.3	25381	94.3333	137.667
24	16162	25739.7	96.6667	143.333
24.5	18084.7	25899	99.3333	151.333
25	18416	26124.7	99.6667	157
25.5	19094	25904.7	103	165.333
26	19746	25635.7	107	175.333
26.5	20320	26024.3	105.667	181
27	20445	26281.3	109.333	190
27.5	21257	26632.3	106.333	197
28	22047	26719.3	112	205.667
28.5	21166	26460	118.667	216.667
29	22044.7	26729	114.667	224
29.5	21924.3	26608	121	234.333
30	22089	26722.7	128	239.667
30.5	22750.7	26801	124	253.333
31	22841.7	26718	134.333	264
31.5	22116.3	26559.3	135.333	277.333
32	22625	26959	134	283.333
32.5	23144.7	27043	141.333	297.667
33	22661	27065.7	141.667	303.667
33.5	23725.3	26755.3	146.333	321.333
34	23431.7	27159	153.667	327.667
34.5	23491.7	27171.7	156.333	339.333
35	23512.7	26903	159	349.333
35.5	23571.3	27147.7	159	362.667
36	24050.3	27239.3	164.667	364.333
36.5	24415	27508	174.333	387
37	24347	27422.7	173	396.667
37.5	24201.3	27197.3	175.333	403
38	23908.3	27116.7	177	418
38.5	24723	27161.3	186.667	431.333
39	24722	27018	189	440.667
39.5	24188.7	26918	188.667	457.667
40	24812.7	27234.7	199.333	466.333
40.5	24113.7	26823.3	198.667	479.667
41	24939.7	27658.7	205.333	500
41.5	24320	27257.7	210	497
42	25166	27078.3	217.333	520.667
42.5	25010.7	27064.3	220	523.333
43	24810.7	26716	231.333	538.333
43.5	24485.7	26810.3	229.333	555

## Sheet: Figure 4 Statistics
Fig. 4B
Mann Whitney test
P value	0.0471
Exact or approximate P value?	Exact
P value summary	*
Significantly different (P < 0.05)?	Yes
One- or two-tailed P value?	Two-tailed
Sum of ranks in column A,B	87 , 49
Mann-Whitney U	13
Fig. 4C
Mann Whitney test
P value	0.0079
Exact or approximate P value?	Exact
P value summary	**
Significantly different (P < 0.05)?	Yes
One- or two-tailed P value?	Two-tailed
Sum of ranks in column A,B	158 , 73
Mann-Whitney U	18
Fig. 4D
Mann Whitney test
P value	0.0003
Exact or approximate P value?	Exact
P value summary	***
Significantly different (P < 0.05)?	Yes
One- or two-tailed P value?	Two-tailed
Sum of ranks in column A,B	169 , 62
Mann-Whitney U	7
Fig. 4E
Mann Whitney test
P value	0.0031
Exact or approximate P value?	Exact
P value summary	**
Significantly different (P < 0.05)?	Yes
One- or two-tailed P value?	Two-tailed
Sum of ranks in column A,B	153 , 57
Mann-Whitney U	12
Fig. 4F
Mann Whitney test
P value	0.2601
Exact or approximate P value?	Exact
P value summary	ns
Significantly different (P < 0.05)?	No
One- or two-tailed P value?	Two-tailed
Sum of ranks in column A,B	139 , 92
Mann-Whitney U	37
Fig 4G
Mann Whitney test
P value	0.061
Exact or approximate P value?	Exact
P value summary	ns
Significantly different (P < 0.05)?	No
One- or two-tailed P value?	Two-tailed
Sum of ranks in column A,B	94 , 137
Mann-Whitney U	28
Fig. 4I
Source of Variation	% of total variation	P value	P value summary			ANOVA table	SS (Type III)	DF	MS	F (DFn, DFd)	P value
Interaction	5.136	0.0717	ns			Interaction	10.53	3	3.509	F (3, 28) = 2.603	P=0.0717
Row Factor (Time)	56.96	<0.0001	****			Row Factor (Time)	116.7	3	38.92	F (3, 28) = 28.86	P<0.0001
Column Factor (Treatment)	15.04	<0.0001	****			Column Factor (Treatment)	30.83	1	30.83	F (1, 28) = 22.87	P<0.0001
						Residual	37.75	28	1.348
Sidak's multiple comparisons test	Predicted (LS) mean diff.	95.00% CI of diff.	Significant?	Summary
Veh vs EGCG
0 min	0	-2.073 to 2.073	No	ns
5 min	-2.3	-4.373 to -0.2270	Yes	*
10 min	-2.4	-4.473 to -0.3270	Yes	*
15 min	-2.75	-4.823 to -0.6770	Yes	**
Fig. 4J
Mann Whitney test
P value	0.0286
Exact or approximate P value?	Exact
P value summary	*
Significantly different (P < 0.05)?	Yes
One- or two-tailed P value?	Two-tailed
Sum of ranks in column A,B	26 , 10
Mann-Whitney U	0
